1 **Interferon-Induced Transmembrane Proteins Inhibit Infection by the Kaposi's Sarcoma-**  
2 **Associated Herpesvirus and the Related Rhesus Monkey Rhadinovirus in a Cell Type-Specific**  
3 **Manner.**

4  
5 Bojan F. Hörnich<sup>1</sup>, Anna K. Großkopf<sup>1</sup>, Candice J. Dcosta<sup>1, \*</sup>, Sarah Schlagowski<sup>1</sup>, Alexander S.  
6 Hahn<sup>1, #</sup>

7 <sup>1</sup>*Junior Research Group Herpesviruses, German Primate Center – Leibniz-Institute for Primate*  
8 *Research, Göttingen, Germany*

9 <sup>\*</sup>Current address: JMIR Publications, Toronto, Ontario

10 <sup>#</sup>Correspondence to: ahahn@dpz.eu

11

12 **RUNNING TITLE:** IFITM-mediated restriction of KSHV and RRV

13

14 **ABSTRACT**

15

16 The interferon-induced transmembrane proteins (IFITMs) are broad-spectrum antiviral proteins  
17 that inhibit the entry of enveloped viruses. We analyzed the effect of IFITMs on the gamma2-  
18 herpesviruses Kaposi's sarcoma-associated herpesvirus (KSHV) and the closely related rhesus  
19 monkey rhadinovirus (RRV). We used CRISPR/Cas9-mediated gene knockout to generate A549,  
20 human foreskin fibroblast (HFF) and human umbilical vein endothelial cells (HUVEC) with  
21 combined IFITM1/2/3 knockout and identified IFITMs as cell type-dependent inhibitors of KSHV

22 and RRV infection in A549 and HFF but not HUVEC. IFITM overexpression revealed IFITM1 as the  
23 relevant IFITM that inhibits KSHV and RRV infection. Fluorescent KSHV particles did not  
24 pronouncedly colocalize with IFITM-positive compartments. However, we found that KSHV and  
25 RRV glycoprotein-mediated cell-cell fusion is enhanced upon IFITM1/2/3 knockout. Taken  
26 together, we identified IFITM1 as a cell type-dependent restriction factor of KSHV and RRV that  
27 acts at the level of membrane fusion. Strikingly, we observed that the endotheliotropic KSHV  
28 circumvents IFITM-mediated restriction in HUVEC despite high IFITM expression, while influenza  
29 A virus (IAV) glycoprotein-driven entry into HUVEC is potently restricted by IFITMs even in the  
30 absence of interferon.

31

## 32 **IMPORTANCE**

33 IFITM proteins are the first line of defense against infection by many pathogens, which may also  
34 have therapeutic importance, as they, among other effectors, mediate the antiviral effect of  
35 interferons. Neither their function against herpesviruses nor their mechanism of action are well  
36 understood. We report here that in some cells, but not in, for example, primary umbilical vein  
37 endothelial cells, IFITM1 restricts KSHV and RRV, and that, mechanistically, this is likely effected  
38 by reducing the fusogenicity of the cell membrane. Further, we demonstrate potent inhibition  
39 of IAV glycoprotein-driven infection of cells of extrapulmonary origin by high constitutive IFITM  
40 expression.

41

42

## 43 **INTRODUCTION**

44 The family of interferon-induced transmembrane proteins (IFITMs) are small membrane  
45 proteins that exhibit antiviral activity toward a broad variety of viruses (1–6). There are five  
46 IFITMs present in the human genome, but only IFITM1, IFITM2, and IFITM3 are known to be  
47 immune-related and interferon(IFN)-inducible (reviewed in (6) and (7)). IFITM1 localizes to the  
48 plasma membrane, while IFITM2 and IFITM3 localize to endosomes/lysosomes (5, 8).

49 The exact mechanism of IFITM-mediated restriction of viral replication is not completely  
50 understood. It is, however, clear that restriction mainly occurs at the viral entry stage (3, 9, 10).  
51 According to some reports, IFITMs modify the overall membrane fusogenicity, by modification  
52 of the membrane lipid composition and/or the membrane rigidity and thus prevent virus-host  
53 membrane fusion (11–14), probably causing arrest of the fusion pore opening following  
54 hemifusion (11, 12, 15). Other modes of action such as e.g. recruitment of additional antiviral  
55 factors, altered endocytic trafficking or interference with vacuolar ATPase have been postulated  
56 as well (reviewed in (16)).

57 The majority of IFITM-restricted viruses are RNA viruses. The interplay of IFITMs with DNA-  
58 viruses has been studied less extensively and with more ambiguous results. While vaccinia virus  
59 and herpes simplex virus (HSV-1) are restricted by overexpression of individual IFITM proteins  
60 (17, 18), human papillomavirus 16 (HPV16) and the non-enveloped adenovirus type 5 are not  
61 (19). Interestingly, for the human cytomegalovirus (HCMV), small interfering RNA (siRNA)-  
62 mediated IFITM knockdown resulted in reduced infection and disturbed virus assembly (20).

63 Varying results were obtained for Epstein-Barr virus (EBV), a gammaherpesvirus. While the  
64 initial entry of EBV was enhanced by overexpression of IFITM1 (21, 22), incorporation of  
65 IFITM2/3 into viral particles reduced the infectivity of progeny virus, whereas IFITM1  
66 incorporation had no effect (23). Together, the literature on IFITM-mediated effects on the

67 alphaherpesvirus HSV-1, the betaherpesvirus HCMV, and the gammaherpesvirus EBV indicate  
68 differences in the activity of IFITM proteins toward different herpesvirus subfamilies.  
69 The Kaposi's sarcoma-associated herpesvirus (KSHV) and the related rhesus monkey  
70 rhadinovirus (RRV) belong to the  $\gamma$ -herpesvirus subfamily (24). KSHV is associated with Kaposi's  
71 sarcoma (KS), multicentric Castleman's disease, primary effusion lymphoma (reviewed in (25)),  
72 osteosarcoma (26), and KSHV inflammatory cytokine syndrome (KICS) (27). The incidence of  
73 KSHV-related disease and KSHV seroprevalence are low in industrial countries (28, 29), but KSHV  
74 represents a significant health burden in Sub-Saharan Africa, where KSHV-related cancers are  
75 common (30, 31).  
76 KSHV and RRV exhibit broad cell tropism *in vitro* (32, 33). Both viruses encode for a set of  
77 glycoproteins (g) that mediate entry and are conserved among herpesviruses. Of these gH, gL,  
78 and gB are the most extensively studied (reviewed in (34)). KSHV and RRV enter many cell types  
79 through the interaction of the gH/gL complex with members of the Ephrin receptor tyrosine  
80 kinase family (Ephs) (35–37) and, in case of RRV also with members of the Plexin domain-  
81 containing protein family (38). KSHV also interacts with heparan sulfate and integrins (39–41).  
82 Entry of both viruses mainly occurs via endocytotic routes (33, 42–44). Following internalization,  
83 the viral membrane fuses with the host membrane. Several reports implicate the gH/gL complex  
84 together with gB as the minimal set of glycoproteins required for membrane fusion (45, 46, 38).  
85 One study reported an enhancing role of IFITMs in the infection of the BJAB B cell line and  
86 human dermal microvascular endothelial cells (HMVEC-D) cells by KSHV, EBV, and herpes  
87 simplex virus 2 (HSV-2) (21). However, given the considerable differences between KSHV and  
88 RRV entry into B cells and different adherent cells (33, 36, 37), in particular, as KSHV infection of  
89 B cell lines is, with a few exceptions, only efficient through cell-to-cell transfer (47–49), we

90 hypothesized that IFITM-mediated restriction may be dependent on the type of target cell.

91 Another question that we sought to address is whether IFITMs restrict RRV in human cells.

92

93

## 94 **RESULTS**

95

### 96 **KSHV induces IFITM expression in A549 cells.**

97 We first validated the specificity of the antibodies used in this study for Western blot analysis  
98 after directed expression (Fig. 1 A). Next, we examined expression of IFITM proteins at baseline  
99 levels and after stimuli such as virus infection in the human lung epithelial cell line A549, which  
100 has been well characterized with regard to IFN signaling and IFITM expression (50–53). We  
101 infected the cells with KSHV BAC16 recombinant virus carrying a green fluorescent protein (GFP)  
102 reporter gene, and RRV-YFP carrying a yellow fluorescent protein (YFP) reporter gene (Fig. 1 B).  
103 Treatment with H<sub>2</sub>O and IFN- $\alpha$  served as negative and positive controls for IFITM induction,  
104 respectively. IFITM2 and IFITM3 were detected at low levels without IFN treatment, while  
105 IFITM1 and human myxovirus resistance gene 1 (MxA), another IFN-induced protein, were not  
106 detectable without stimulation (Fig. 1 C). At the 1 h timepoint, neither treatment induced IFITM  
107 or MxA expression relative to the background. At the 24 h timepoint, induction over background  
108 levels of IFITM1, IFITM2, IFITM3, and MxA was observed in IFN- $\alpha$ -treated or KSHV-infected cells,  
109 but not in RRV-infected cells. At 48 h, IFITM3 was also slightly induced by RRV, and IFITM2  
110 induction relative to H<sub>2</sub>O treatment was barely discernable anymore. Basal IFITM expression  
111 also increased slightly over time after plating. In summary, KSHV-containing inoculum and IFN- $\alpha$   
112 induced IFITM expression.

113

114 **Triple knockout of IFITM1/2/3 enhances KSHV and RRV infection of A549 and HFF.**

115 Overexpression of IFITMs alters their subcellular localization ((6), own observations), IFITMs are

116 usually induced together, and recent studies report that IFITMs form homo- and hetero-

117 oligomers (54–56) and might thus act synergistically. We therefore used CRISPR/Cas9 to

118 generate triple IFITM1/2/3 knockout cells to study the effects of basal IFITM expression as well

119 as IFN-induced IFITM expression on KSHV and RRV infection. We identified two single guide

120 RNAs (sgRNAs) (sgIFITM1/2/3-a, sgIFITM1/2/3-b), which target the second exon of all three

121 immune-related IFITMs (Fig. 2 A, 2 B). These sgRNAs were transduced together with Cas9 using

122 the lentiCRISPRv2 system (57).

123 We chose the lung epithelial cell line A549 as an epithelial cell model. KSHV is occasionally

124 detected in lung tissue (58) and A549 are well characterized with regard to IFITM-mediated

125 restriction of different viruses (1, 9, 53). HFF were chosen as a fibroblast model and HUVEC as a

126 model for endothelial cells. Knockout or substantial knockdown of IFITM1, IFITM2, and IFITM3

127 was achieved (Fig. 3 A-C, right panel). Lentiviral particles (LP) encoding a GFP reporter gene

128 pseudotyped with IAV-hemagglutinin (HA)/neuraminidase (NA) (IAV-LP) served as positive

129 control for IFITM-mediated restriction, while particles pseudotyped with IFITM-resistant

130 amphotropic murine leukemia virus (MLV) envelope (MLV-LP) served as negative control (1).

131 Infections were performed with or without prior IFN- $\alpha$  stimulation. IFN- $\alpha$  treatment resulted in

132 a significant reduction of KSHV, RRV, and IAV-LP infection in A549 (Fig. 3 A, left panel). Both

133 KSHV and RRV infection were enhanced in non-IFN- $\alpha$ -treated IFITM1/2/3 knockout A549,

134 indicating that basal IFITM levels or IFITM expression induced upon contact with the inoculum

135 affect KSHV and RRV infection of A549. In IFN- $\alpha$ -treated IFITM1/2/3 knockout cells, infection

136 nearly reached levels of non-IFN- $\alpha$ -treated sgNT-transduced cells without IFITM1/2/3 knockout.  
137 IAV-LP infection was dramatically increased upon IFITM1/2/3 knockout, while MLV-LP infection  
138 was not affected by IFITM1/2/3 knockout in A549, in keeping with published results (1).  
139 IFN- $\alpha$  pre-treatment reduced KSHV and RRV infection of HFF more potently than infection of  
140 A549 (Fig. 3 B, left panel). However, IFITM1/2/3 knockout in HFF only enhanced KSHV infection  
141 of IFN- $\alpha$ -treated cells, while RRV infection was slightly but significantly enhanced in both IFN- $\alpha$   
142 and non-IFN- $\alpha$ -treated IFITM1/2/3 knockout cells. We observed relatively high basal IFITM2/3  
143 expression in HFF, which was only marginally increased by IFN- $\alpha$  (Fig. 3 B, right panel). Infection  
144 of IFN- $\alpha$ -treated IFITM1/2/3 knockout HFF by KSHV or RRV did not reach levels of untreated  
145 sgNT-transduced cells, unlike what was observed with A549, suggesting that IFITM-mediated  
146 restriction of KSHV and RRV infection plays a comparatively minor role in the overall IFN- $\alpha$ -  
147 mediated restriction of these two herpesviruses in HFF. The most potent effect of IFITM1/2/3  
148 knockout was observed with IAV-LP infection, which was increased in both IFN- $\alpha$ - and control-  
149 treated cells. MLV-LP infection of HFF was not significantly affected by IFITM1/2/3 knockout.  
150 Like HFF, HUVEC expressed IFITM2 and IFITM3 at high basal levels (Fig. 3 C, right panel). IFN- $\alpha$   
151 treatment of HUVEC resulted in a reduction of KSHV infection and an even more pronounced  
152 reduction of RRV infection (Fig. 3 C, left panel). However, IFITM1/2/3 knockout had no  
153 significant effect on KSHV or RRV infection. Again, IAV-LP infection was strongly enhanced by  
154 IFITM1/2/3 knockout in both IFN- $\alpha$ - and non-treated HUVEC cells, while MLV-LP was not  
155 affected.  
156 Overall, these results demonstrate IFITM-mediated restriction of KSHV and RRV infection of  
157 A549 and HFF, but not HUVEC.

158

159 **IFITM1 overexpression reduces KSHV and RRV infection in a cell type-dependent manner.**

160 We next investigated the effect of individual IFITMs through directed expression by retroviral  
161 transduction (Fig. 4 A-D, right panel) and included additional cell lines: i) 293T cells as another  
162 cell line of either epithelial or neuroendocrine origin (59), and ii) SLK cells, a clear renal  
163 carcinoma cell line (60) that is an established model for KSHV infection and propagation (61).  
164 We excluded HUVEC here, as IFITM1/2/3 knockout was without effect in these cells, despite  
165 high IFITM expression, which makes it unlikely that additional overexpression yields meaningful  
166 results.

167 Overexpression of IFITM1 in A549 reduced KSHV and RRV infection by over 50%, whereas  
168 overexpression of IFITM2 and IFITM3 only resulted in a non-significant reduction (Figure 4 A left  
169 panel), identifying IFITM1 as the IFITM that restricts KSHV and RRV in A549 cells. In agreement  
170 with the results in IFITM1/2/3 knockout experiments and published results (1), IAV-LP infection  
171 was reduced by all IFITMs, most prominently by IFITM3, and infection of MLV-LP was not  
172 affected.

173 IFITM1 overexpression also reduced RRV and KSHV infection of HFF (Fig. 4 B, left panel), but the  
174 effect did not reach statistical significance, mostly because of a rather high pooled variance in  
175 this set of experiments, which may reflect the primary nature of HFF combined with  
176 comparatively high constitutive IFITM expression. In addition, we observed a non-significant but  
177 noticeable enhancement of RRV infection in IFITM2-overexpressing HFF. Again, these  
178 observations are in agreement with the effects observed in IFITM1/2/3 knockout HFF. While  
179 IAV-LP infection was reduced in HFF, MLV-LP infection was enhanced by overexpression of all  
180 IFITMs, significantly for IFITM2 and IFITM3.



181 A trend similar to that observed in A549 was also observed in 293T (Fig. 4 C, left panel): IFITM1  
182 overexpression reduced KSHV and RRV infection, although not significantly for RRV. MLV-LP  
183 infection was slightly increased by overexpression of IFITM3 in 293T.  
184 A different observation was made in SLK (Figure 4 D, left panel), where neither IFITM1 nor  
185 IFITM3 overexpression resulted in reduced KSHV or RRV infection. Again, IFITM2 overexpression  
186 in SLK slightly enhanced KSHV infection and significantly enhanced RRV infection. An  
187 enhancement of infection by all IFITMs was observed with MLV, significantly for IFITM3.  
188 Taken together, our IFITM overexpression experiments corroborated the results observed in our  
189 IFITM1/2/3 knockout experiments and a cell type-dependent activity of individual IFITMs  
190 towards KSHV and RRV. Furthermore, IFITM1 was identified as the major contributor to IFITM-  
191 mediated restriction of KSHV and RRV.

192

### 193 **KSHV does not specifically colocalize with IFITMs.**

194 IFITM localization was reported to play a critical role in their antiviral effect (62, 63). For the  
195 highly restricted IAV, IFITM3-mediated restriction might be partially explained by the  
196 observation that IAV specifically colocalizes with IFITM3-positive vesicles (15, 53). As expected,  
197 we observed different subcellular localizations of IFITM1, IFITM2, and IFITM3 in IFN- $\alpha$ -treated  
198 A549 (Fig. 5 A). IFITM2 and IFITM3 partially colocalized with the early endosome marker EEA1  
199 and to a larger extent with the late endosome/lysosome marker LAMP1, while IFITM1 localized  
200 to the plasma membrane and was distributed more toward the perimeter of the cell. IFITM1  
201 was also found colocalized with EEA1 and LAMP1, but not as pronounced as IFITM2/IFITM3.  
202 Next, we analyzed colocalization of KSHV particles with IFITMs. We utilized a KSHV\_mNeon-  
203 orf65, which is tagged with mNeonGreen at the capsid protein orf65, to visualize virions in IFN-

204  $\alpha$ -treated cells at different timepoints (Fig. 5 B). KSHV\_mNeon-orf65 particles were detectable  
205 at the perimeter at the 0-min timepoint and were detected inside the cells from the 30-min  
206 timepoint on. Some particles reached the nucleus at the 240-min timepoint. As IFITMs are  
207 widely distributed throughout the cell, partial overlap with KSHV\_mNeon-orf65 particles was  
208 observed for all IFITMs, most prominently at later time points and for IFITM1. While some  
209 particles localized to areas of high intensity in the IFITM staining, KSHV\_mNeon-orf65 particles  
210 were also frequently found in regions with overall lower IFITM signal. These areas were often  
211 adjacent to IFITM-positive areas, which might be compatible with the luminal spaces of large  
212 vesicles.

213

#### 214 **KSHV and RRV glycoprotein-mediated cell-cell fusion is reduced by IFITMs.**

215 IFITMs were reported to modulate overall membrane fusogenicity and thereby entry of viral  
216 particles (11, 12, 64). We therefore utilized a cell-cell fusion assay to determine whether KSHV  
217 and RRV glycoprotein-mediated fusion activity is modulated by IFITMs. 293T effector cells were  
218 transfected with KSHV gH/gL or RRV gH/gL together with RRV gB and a plasmid encoding a  
219 VP16-Gal4 transactivator fusion protein. RRV gB was used because KSHV gB does not allow for  
220 efficient cell-cell fusion (46). Transfected effector cells were added to IFN- $\alpha$ -treated A549  
221 IFITM1/2/3 knockout cells transduced with a lentiviral Gal4-driven TurboGFP-luciferase reporter  
222 construct or 293T cells transfected to express IFITM1, IFITM2, or IFITM3, and a Gal4-driven  
223 TurboGFP-luciferase reporter construct. Luciferase activity was measured as a readout for  
224 fusion.

225 Treatment with IFITM-targeting sgRNAs resulted in an increase of KSHV and RRV gH/gL/gB-  
226 mediated cell-cell fusion compared to non-targeting controls (Fig. 6 A). Viral glycoprotein

227 expression and IFITM1/2/3 knockout in target cells was confirmed by Western blot (Fig. 6 B).  
228 Under conditions of recombinant overexpression, all three IFITMs were capable of reducing  
229 KSHV and RRV gH/gL/gB-mediated cell-cell fusion, with IFITM1 being the most effective (Fig. 6  
230 C). To exclude the possibility that the inhibition of KSHV and RRV glycoprotein-mediated cell-cell  
231 fusion occurs in response to changes in cell surface protein composition upon IFITM1/2/3  
232 knockout, we measured cell surface expression of a set of selected cell-surface receptors. Cell  
233 surface expression of the KSHV receptors EphA2 and integrin  $\alpha V$  as well as transferrin receptor  
234 (TrfR) remained unchanged upon IFITM1/2/3 knockout (Fig. 6 D). This suggests that IFITMs  
235 reduce cell-cell fusion through a mechanism distinct from receptor regulation.

236

237

## 238 **DISCUSSION**

239

240 Differences in the activity of IFITMs against several members of the herpesvirus family have  
241 already been reported (18–21, 23). Here, we report that human IFITM1 inhibits the entry of  
242 KSHV and of the closely related rhesus macaque virus RRV in a cell type-dependent manner. We  
243 identified inhibition of membrane fusion as a potential mechanism through which IFITMs can  
244 modulate KSHV and RRV infection.

245 Combined knockout of all three IFITMs enabled us to study IFITM-mediated restriction through  
246 loss-of-function at expression levels that are induced through IFN signaling and free from  
247 potential artefacts through overexpression-induced mislocalization. Our approach revealed that  
248 KSHV and RRV infection are enhanced upon IFITM1/2/3 knockout in A549 and HFF but not in  
249 HUVEC. This finding may be explained by differences in entry routes that KSHV and RRV utilize

250 to enter these different cell types. KSHV was shown to enter HFF (65) and RRV rhesus fibroblasts  
251 (33, 44) via clathrin-mediated endocytosis, whereas KSHV enters HUVEC via macropinocytosis  
252 (42). While most viruses that are restricted by IFITMs enter cells via clathrin- or caveolin-  
253 mediated endocytosis, only Ebola and Marburg viruses are restricted and enter their target cells  
254 predominantly via macropinocytosis (reviewed in (66)). However, Ebola and Marburg virus  
255 glycoproteins are activated by endosomal cathepsins, which are mainly found in endolysosomal  
256 vesicles that also contain IFITMs (reviewed in (67, 68)). In contrast, KSHV might already fuse in  
257 acidified IFITM-negative macropinocytotic compartments and thereby avoid IFITM restriction in  
258 HUVEC cells. Although IFITM1/2/3 knockout enhanced KSHV and RRV infection in A549 and HFF,  
259 the overall contribution to the IFN-mediated block to infection was different. In HFF, the  
260 enhancement was mainly observable in IFN- $\alpha$ -treated cells, while in A549 the enhancement was  
261 also observable in non-IFN-treated cells. In A549, the IFITM1/2/3 knockout-mediated  
262 enhancement practically cancelled out the IFN- $\alpha$ -mediated inhibition of KSHV and RRV  
263 infection, similar to what was observed for the highly restricted IAV-LP. Unfortunately, the  
264 detailed mechanism of KSHV and RRV entry into A549 cells is presently unknown. Differences in  
265 the response to IFITM1/2/3 knockout may very well represent differences in the viral entry  
266 routes. Despite minor differences, IFITM1/2/3 knockout similarly impacted KSHV and RRV  
267 infection, compatible with a broadly acting mechanism like decreasing membrane fusogenicity.  
268 Vice versa it was also shown that primate IFITMs are effective against human viruses (69, 70), in  
269 line with the high degree of conservation of IFITMs in primate species (71, 72).  
270 Overexpression of individual IFITMs in different cell types revealed IFITM1 as the major  
271 contributor to IFITM-mediated restriction of KSHV and RRV. Similar to our observations, an  
272 antiviral effect of IFITM1 in A549 cells was also identified for the alphaherpesvirus HSV-1 in

273 IFITM1 overexpression and siRNA-mediated knockdown experiments (18), which suggests broad  
274 activity of IFITM1 against herpesviruses. Of note, an effect of IFITM1 on KSHV infection has  
275 already been described by Hussein et al.; however, in contrast to our study, their study reported  
276 that infection by KSHV, EBV, and HSV-2 was enhanced upon overexpression of IFITM1 in the  
277 BJAB B-cell cell line and in HMVEC-D cells (21). While we did not observe this phenomenon in  
278 the cell types analyzed in this study, our observations of cell-type dependent antiviral activity do  
279 not rule out the possibility that in some cell types infection might actually be enhanced by  
280 IFITM1 expression. In line with this notion, overexpression of IFITM2 resulted in a mild  
281 enhancement of RRV infection in SLK and HFF (Fig. 4).

282 IFITM1-mediated inhibition of KSHV or RRV infection was less pronounced than inhibition of IAV  
283 glycoprotein-driven entry, and inhibition by IFITM2 and IFITM3 was not observable. This is  
284 compatible with our results in colocalization experiments. Several groups reported that IAV  
285 colocalized strongly with IFITM3 (15, 53, 73). We were unable to observe a pronounced  
286 colocalization of IFITMs with KSHV particles. Rather, KSHV\_mNeon-orf65 particles that entered  
287 the cell were frequently observed in regions with low IFITM signal. While these findings argue  
288 against concentration of IFITMs at viral particles, they would be compatible with indirect  
289 mechanisms of action such as rerouting of endocytotic pathways or reduction of membrane  
290 fusogenicity.

291 Mechanistically, we found that IFITMs modulate KSHV and RRV glycoprotein-induced  
292 membrane fusion at IFN- $\alpha$ -induced levels. Overexpression of IFITM1, IFITM2, and IFITM3  
293 revealed that all three IFITMs can in principle reduce the KSHV and RRV glycoprotein-induced  
294 cell-cell fusion to a different degree. It should be noted that overexpression of IFITMs leads to  
295 abnormal localization, thereby potentially broadening activity. This supports the theory that all

296 IFITMs are, in principle, capable of restricting fusion (6, 16, 74), which might be counteracted by  
297 avoidance of IFITM-positive compartments. In line with our experiments, IFITM overexpression  
298 was reported to reduce the fusion activity of other viral fusion proteins including the IAV-HA  
299 (12, 13, 15) and severe acute respiratory syndrome coronavirus 2 spike (75) as well as the  
300 glycoprotein of the otherwise non-restricted Lassa virus (15). Although cell-cell fusion does not  
301 universally mirror virus-cell fusion (76), our findings support a model of IFITM1 rendering the  
302 membrane less fusogenic. A general impact of IFITMs on membrane properties is also  
303 supported by a report that IFITMs inhibit trophoblast fusion (64). While our approach of a triple  
304 knockout was also intended to identify potential synergism between the three IFITMs, it did not  
305 do so. In HFF, IFITM1 might even counteract the mild enhancing effect that IFITM2 had on RRV  
306 infection (Fig. 4 B). Overexpression of IFITM1 was sufficient to effect inhibition with a similar  
307 magnitude as the enhancement that was observed after knockout. In light of our results and a  
308 recent report that IFITM3 blocks the IAV fusion process through increasing membrane stiffness  
309 (13), one might speculate that the three IFITMs exert their inhibitory activity through a similar  
310 mechanism at different locations.

311 Entry driven by the HA and NA glycoproteins of IAV, a respiratory pathogen, was far more  
312 potently restricted by IFITMs in fibroblasts and endothelial cells, particularly at constitutive  
313 expression levels, than in A549 lung epithelial cells. KSHV and likely RRV (77) are  
314 endotheliotropic viruses and were restricted in lung epithelial cells but not endothelial cells. This  
315 suggests that IFITMs, which are constitutively expressed at high levels in HUVEC and fibroblasts,  
316 constitute a major line of defense against disseminated infection of extrapulmonary tissues by  
317 the respiratory pathogen IAV, and that KSHV and RRV may have evolved to avoid IFITM-  
318 mediated restriction in their biological niche.

319

320

## 321 **MATERIALS AND METHODS**

322

### 323 **Cell culture**

324 All cell lines in this study (Table 1) were incubated at 37°C and 5% CO<sub>2</sub> and cultured in  
325 Dulbecco's modified Eagle medium, high glucose, GlutaMAX, 25 mM HEPES (Thermo Fisher  
326 Scientific) supplemented with 10% fetal calf serum (FCS; Thermo Fisher Scientific) and 50 µg/ml  
327 gentamicin (PAN-Biotech) (D10) except for HUVEC, which were maintained in standard  
328 Endothelial Cell Growth Medium 2 (PromoCell), and iSLK cells, which were maintained in D10  
329 supplemented with 2.5 µg/ml puromycin (InvivoGen) and 250 µg/ml G418 (Carl Roth). IFN-α  
330 treatment was performed by supplementing the respective culture medium with IFN-α 2b  
331 (Sigma; 5000 U/ml). For seeding and subculturing of cells, the medium was removed, the cells  
332 were washed with phosphate-buffered saline (PBS; PAN-Biotech), and detached with trypsin  
333 (PAN-Biotech). All transfections were performed using polyethylenimine (PEI; Polysciences) at a  
334 1:3 ratio (mg DNA/mg PEI) mixed in Opti-MEM (Thermo Fisher Scientific).

335

### 336 **Retroviral vectors and pseudotyped lentiviral particles**

337 Retroviruses, lentiviruses and lentiviral pseudotypes were produced by PEI-mediated  
338 transfection of 293T cells (see Table 2 for plasmids). For retrovirus production, plasmids  
339 encoding gag/pol, pMD2.G encoding VSV-G, and the respective pQCXIP-constructs were  
340 transfected (ratio 1.6:1:1.6). For production of lentiviruses used for transduction, psPAX2  
341 encoding gag/pol, pMD2.G encoding VSV-G and the respective lentiviral construct, Gal4-driven

342 TurboGFP-luciferase reporter lentivirus (AX526) or plentiCRISPRv2 were used (ratio 2.57:1:3.57).  
343 For lentiviral pseudotypes psPAX2, pLenti CMV GFP Neo and expression plasmids for pCAGGS  
344 IAV\_WSN-HA and pCAGGS IAV\_WSN-NA for IAV-LP or paMLV\_env for MLV-LP were used (ratio  
345 1:1.4:2.4). Viruses were harvested twice, 24-48 h and 72-96 h after transfection, passed through  
346 a 0.45- $\mu$ m CA filter and frozen at -80°C. Transduction was performed by adding retroviruses and  
347 lentiviruses to cells for 48 h. Afterwards, selection was performed using 10  $\mu$ g/mL puromycin  
348 (InvivoGen; pQCXIP and plentiCRISPRv2 constructs) or 10  $\mu$ g/mL blasticidin (InvivoGen; AX526  
349 lentivirus).

350

#### 351 **Production of KSHV, KSHV\_mNeon-orf65, and RRV**

352 For the construction of KSHV\_mNeon-orf65, the GFP open reading frame of BAC16 was replaced  
353 with a Zeocin resistance gene by amplifying the resistance gene from pcDNA6 (Invitrogen) using  
354 Phusion PCR (NEB) and primers BAC16\_downstream\_of\_GFP\_STOP\_overhang\_plus\_Zeo\_3' and  
355 BAC16\_upstream\_of\_GFP\_ATG\_antisense\_strand\_overhang\_plus\_EM7\_P\_start  
356 and inserting it into BAC16 via recombination. A shuttle construct, Ax185\_  
357 pCNSmNeonGreen\_Kana, was created by inserting the i-SceI/Kanamycin cassette of pEPkan-S  
358 (78) into pNCSmNeonGreen using primers mNeonGreen\_463-482\_for plus  
359 mNeonGreen\_504-523\_rev for the vector and  
360 EPKansS\_reverse\_mNeon\_463-482\_ov plus  
361 EPKans\_forward\_mNeon\_504-523\_ov for the insert, followed by Gibson assembly.  
362 KSHV\_mNeon-orf65 was generated by inserting the mNeonGreen cassette 5' of the first amino  
363 acid of orf65 with the addition of a glycine-serine linker according to the protocol described by



364 Tischler et al. (78). The recombination cassette was generated using primers mNeon-GS-  
365 KSHVorf65\_for  
366 plus mNeon-GS-KSHVorf65\_rev and Ax185\_pCNSmNeonGreen\_Kana as a template.  
367 Infectious KSHV and RRV reporter viruses were produced as described previously (36). See Table  
368 3 for oligonucleotide sequences.

369

### 370 **Western blot**

371 Western blotting was performed as described previously (36) using the respective antibodies  
372 (Table 4).

373

### 374 **CRISPR/Cas9-mediated knockout of immune-related IFITMs**

375 IFITM1-, IFITM2-, and IFITM3-knockout cell pools were generated by CRISPR/Cas9-mediated  
376 knockout following the protocol described by Sanjana et al. (57), except that PEI transfection  
377 was used. In short, the cells intended for knockout were transduced with lentiviruses harboring  
378 the CRISPR/Cas9 gene and sgRNAs targeting IFITM1-3 (sgIFITM1/2/3-a, sgIFITM1/2/3-b) or non-  
379 targeting sgRNAs (sgNT-a, sgNT-b). For detection of CRISPR/Cas9-mediated knockout, the cells  
380 were treated with IFN- $\alpha$  (5000 U/ml) for 16 h. Thereafter, the cells were harvested and  
381 subjected to Western blot analysis.

382

### 383 **Infection experiments**

384 IFITM-overexpressing cells were seeded in 48-well plates at 90% confluency 16 h prior to  
385 infection. IFITM1/2/3 knockout cells were seeded in 48-well-plates at 70%-80% confluency.  
386 After attachment, cells were treated with IFN- $\alpha$  (5000 U/ml) or H<sub>2</sub>O (control) for 16 h prior to

387 infection with either KSHV, RRV, IAV-LP or MLV-LP. 48 h post infection, cells were trypsinized,  
388 trypsin activity was inhibited by adding 5% FCS in PBS, and the cells were washed and fixed with  
389 4% methanol-free formaldehyde (Roth) in PBS. Infection was determined by detection of  
390 GFP<sup>+</sup>/YFP<sup>+</sup> cells using a LSRII flow cytometer; at least 5000 cells were analyzed.

391

### 392 **Cell-cell fusion assay**

393 293T effector cells were seeded in 6-well plates or 10-cm dishes at 70%-80% confluency and  
394 transfected with either empty vector, gH/gL<sub>KSHV</sub> gB<sub>RRV</sub> or gH/gL<sub>RRV</sub>gB<sub>RRV</sub>, and Vp16-Gal4. 293T  
395 transfected with Gal4-TurboGFP-Luc and pQCXIP-IFITM1-3 were seeded in 48-well plates at  
396 50,000 cells/well. A549 double transduced with lentiviruses encoding a Gal4-driven TurboGFP-  
397 luciferase reporter and lentiviruses encoding the CRISPR/Cas9 gene and the respective sgRNAs  
398 were seeded in 96-well-plates at 20,000 cells/well, 6 h after seeding the cells were treated with  
399 IFN- $\alpha$  (5000 U/ml) for 16 h. Cell-cell fusion was started by adding the glycoprotein-expressing  
400 effector cells to the target cells in a 1:1 ratio. After 48 h, the cells were lysed in Luciferase Cell  
401 Culture Lysis Reagent (Promega) and luciferase activity was determined using Beetle-Juice  
402 luciferase assay (PJK Biotech) according to the manufacturer's instructions and a BioTek Synergy  
403 2 plate reader.

404

### 405 **Flow cytometry**

406 For detection of cell surface proteins, A549 IFITM1/2/3 knockout cells were H<sub>2</sub>O or IFN- $\alpha$   
407 treated for 16 h, washed with PBS, detached using EDTA/EGTA (5 mM/5 mM) at 37°C and  
408 washed with cold PBS (4°C). The cells were fixed with 4% methanol-free formaldehyde for 5min  
409 and washed twice with PBS. Following blocking with 10% FCS (blocking buffer) in PBS, the cells

410 were incubated with primary antibody (Table 4) in blocking buffer for 90 min at 4°C. After  
411 washing with PBS, the cells were incubated with secondary antibody (Table 4) in blocking buffer  
412 for 45 min at RT in the dark. The cells were washed and post-fixed with 2% methanol-free  
413 formaldehyde in PBS. Analysis was performed using an LSRII flow cytometer (BD Biosciences)  
414 and Flowing software (University of Turku, version 2.5).

415

#### 416 **Immunofluorescence.**

417 A549 were seeded on 12-mm coverslips (YX03.1, Carl Roth) in 24-well plates at  
418 150,000 cells/well. After attachment, the cells were treated with either H<sub>2</sub>O (control) or IFN- $\alpha$   
419 (5000 U/ml) for 16 h. After 24 h, cold KSHV\_mNEON-ORF65 was added. Cells were centrifuged  
420 (4,200 rpm, 4°C, 30 min), followed by a 10-min incubation at 4°C. After 3 washes with cold PBS,  
421 cells were either fixed in 4% methanol-free formaldehyde in PBS for 10 min (0-min timepoint) or  
422 shifted to 37°C after addition of D10. At the indicated timepoints, cells were washed once in PBS  
423 and fixed in 4% methanol-free formaldehyde in PBS for 10 min. After fixation, cells were washed  
424 three times in PBS. Cell permeabilization and blocking was performed in IF buffer (5% FCS,  
425 0.05% saponin (Sigma) in PBS) for 1 h. Primary antibody (see Table 4) incubation was performed  
426 in IF buffer overnight at 4°C. Secondary antibody (see Table 4) incubation or incubation with a  
427 directly labeled phalloidin probe was performed after three washes with IF buffer for 1 h at RT.  
428 Cells were washed once in IF buffer and stained with Hoechst 33342 1:10000 in PBS (#62249,  
429 Thermo Scientific) for 5 min, followed by a final wash with PBS. The coverslips were dried and  
430 mounted in anti-Fade Fluorescence Mounting Medium (ab104135, abcam). Images were  
431 acquired on a confocal laser scanning microscope (Zeiss LSM800). Laser intensity and signal

432 amplification were maintained between different conditions for each antibody staining. All  
433 images were processed using Fiji/ImageJ software.

434

435

#### 436 **ACKNOWLEDGEMENTS**

437 This work was supported by grants from the Deutsche Forschungsgemeinschaft ([www.dfg.de](http://www.dfg.de),  
438 HA 6013/4-1) and the Wilhelm-Sander Foundation ([www.wilhelmsander-  
stiftung.de](http://www.wilhelmsander-<br/>439 stiftung.de), project 2019.027.1).

440 We thank Stefan Pöhlmann and Michael Farzan for sharing plasmids; Klaus Korn for sharing  
441 human foreskin fibroblasts; Rüdiger Behr for sharing rhesus monkey fibroblasts; Scott Wong for  
442 sharing RRV gB antibodies.

443

444

445 **REFERENCES**

446

- 447 1. Brass AL, Huang I-C, Benita Y, John SP, Krishnan MN, Feeley EM, Ryan BJ, Weyer JL,  
448 van der Weyden L, Fikrig E, Adams DJ, Xavier RJ, Farzan M, Elledge SJ. 2009. The IFITM  
449 Proteins Mediate Cellular Resistance to Influenza A H1N1 Virus, West Nile Virus, and Dengue  
450 Virus. 7. *Cell* 139:1243–1254.
- 451 2. Huang I-C, Bailey CC, Weyer JL, Radoshitzky SR, Becker MM, Chiang JJ, Brass AL,  
452 Ahmed AA, Chi X, Dong L, Longobardi LE, Boltz D, Kuhn JH, Elledge SJ, Bavari S, Denison  
453 MR, Choe H, Farzan M. 2011. Distinct Patterns of IFITM-Mediated Restriction of Filoviruses,  
454 SARS Coronavirus, and Influenza A Virus. 1. *PLoS Pathog* 7:e1001258.
- 455 3. Wrensch F, Karsten CB, Gnirß K, Hoffmann M, Lu K, Takada A, Winkler M, Simmons  
456 G, Pöhlmann S. 2015. Interferon-Induced Transmembrane Protein–Mediated Inhibition of Host  
457 Cell Entry of Ebolaviruses. suppl 2. *J Infect Dis* 212:S210–S218.
- 458 4. Shi G, Kenney AD, Kudryashova E, Zani A, Zhang L, Lai KK, Hall-Stoodley L,  
459 Robinson RT, Kudryashov DS, Compton AA, Yount JS. 2021. Opposing activities of IFITM  
460 proteins in SARS-CoV-2 infection. *EMBO J* 40.
- 461 5. Mudhasani R, Tran JP, Retterer C, Radoshitzky SR, Kota KP, Altamura LA, Smith JM,  
462 Packard BZ, Kuhn JH, Costantino J, Garrison AR, Schmaljohn CS, Huang I-C, Farzan M, Bavari  
463 S. 2013. IFITM-2 and IFITM-3 but Not IFITM-1 Restrict Rift Valley Fever Virus. *Journal of*  
464 *Virology* 87:8451–8464.
- 465 6. Bailey CC, Zhong G, Huang I-C, Farzan M. 2014. IFITM-Family Proteins: The Cell’s  
466 First Line of Antiviral Defense. 1. *Annu Rev Virol* 1:261–283.
- 467 7. Siegrist F, Ebeling M, Certa U. 2011. The Small Interferon-Induced Transmembrane  
468 Genes and Proteins. *Journal of Interferon & Cytokine Research* 31:183–197.
- 469 8. Weston S, Czesio S, White IJ, Smith SE, Kellam P, Marsh M. 2014. A Membrane  
470 Topology Model for Human Interferon Inducible Transmembrane Protein 1. 8. *PLoS ONE*  
471 9:e104341.
- 472 9. Feeley EM, Sims JS, John SP, Chin CR, Pertel T, Chen L-M, Gaiha GD, Ryan BJ, Donis  
473 RO, Elledge SJ, Brass AL. 2011. IFITM3 Inhibits Influenza A Virus Infection by Preventing  
474 Cytosolic Entry. 10. *PLoS Pathog* 7:e1002337.
- 475 10. Narayana SK, Helbig KJ, McCartney EM, Eyre NS, Bull RA, Eltahla A, Lloyd AR, Beard  
476 MR. 2015. The Interferon-induced Transmembrane Proteins, IFITM1, IFITM2, and IFITM3  
477 Inhibit Hepatitis C Virus Entry. 43. *J Biol Chem* 290:25946–25959.
- 478 11. Li K, Markosyan RM, Zheng Y-M, Golfetto O, Bungart B, Li M, Ding S, He Y, Liang C,  
479 Lee JC, Gratton E, Cohen FS, Liu S-L. 2013. IFITM Proteins Restrict Viral Membrane  
480 Hemifusion. *PLOS Pathogens* 9:18.
- 481 12. Desai TM, Marin M, Chin CR, Savidis G, Brass AL, Melikyan GB. 2014. IFITM3  
482 Restricts Influenza A Virus Entry by Blocking the Formation of Fusion Pores following Virus-  
483 Endosome Hemifusion. 4. *PLoS Pathog* 10:e1004048.
- 484 13. Guo X, Steinkühler J, Marin M, Li X, Lu W, Dimova R, Melikyan GB. 2021. Interferon-  
485 Induced Transmembrane Protein 3 Blocks Fusion of Diverse Enveloped Viruses by Altering

- 486 Mechanical Properties of Cell Membranes. *ACS Nano* 15:8155–8170.
- 487 14. Amini-Bavil-Olyae S, Choi YJ, Lee JH, Shi M, Huang I-C, Farzan M, Jung JU. 2013.
- 488 The Antiviral Effector IFITM3 Disrupts Intracellular Cholesterol Homeostasis to Block Viral
- 489 Entry. *Cell Host Microbe* 13:452–464.
- 490 15. Suddala KC, Lee CC, Meraner P, Marin M, Markosyan RM, Desai TM, Cohen FS, Brass
- 491 AL, Melikyan GB. 2019. Interferon-induced transmembrane protein 3 blocks fusion of sensitive
- 492 but not resistant viruses by partitioning into virus-carrying endosomes. 1. *PLoS Pathog*
- 493 15:e1007532.
- 494 16. Shi G, Schwartz O, Compton AA. 2017. More than meets the I: the diverse antiviral and
- 495 cellular functions of interferon-induced transmembrane proteins. 1. *Retrovirology* 14:53.
- 496 17. Li C, Du S, Tian M, Wang Y, Bai J, Tan P, Liu W, Yin R, Wang M, Jiang Y, Li Y, Zhu
- 497 N, Zhu Y, Li T, Wu S, Jin N, He F. 2018. The Host Restriction Factor Interferon-Inducible
- 498 Transmembrane Protein 3 Inhibits Vaccinia Virus Infection. *Front Immunol* 9:228.
- 499 18. Smith SE, Busse DC, Binter S, Weston S, Diaz Soria C, Laksono BM, Clare S, Van
- 500 Nieuwkoop S, Van den Hoogen BG, Clement M, Marsden M, Humphreys IR, Marsh M, de Swart
- 501 RL, Wash RS, Tregoning JS, Kellam P. 2018. Interferon-Induced Transmembrane Protein 1
- 502 Restricts Replication of Viruses That Enter Cells via the Plasma Membrane. *J Virol* 93:e02003-
- 503 18. /jvi/93/6/JVI.02003-18.atom.
- 504 19. Warren CJ, Griffin LM, Little AS, Huang I-C, Farzan M, Pyeon D. 2014. The Antiviral
- 505 Restriction Factors IFITM1, 2 and 3 Do Not Inhibit Infection of Human Papillomavirus,
- 506 Cytomegalovirus and Adenovirus. 5. *PLoS ONE* 9:e96579.
- 507 20. Xie M, Xuan B, Shan J, Pan D, Sun Y, Shan Z, Zhang J, Yu D, Li B, Qian Z. 2015.
- 508 Human Cytomegalovirus Exploits Interferon-Induced Transmembrane Proteins To Facilitate
- 509 Morphogenesis of the Virion Assembly Compartment. 6. *J Virol* 89:3049–3061.
- 510 21. Hussein HAM, Akula SM. 2017. miRNA-36 inhibits KSHV, EBV, HSV-2 infection of
- 511 cells via stifling expression of interferon induced transmembrane protein 1 (IFITM1). 1. *Sci Rep*
- 512 7:17972.
- 513 22. Hussein HAM, Briestenska K, Mistrikova J, Akula SM. 2018. IFITM1 expression is
- 514 crucial to gammaherpesvirus infection, in vivo. 1. *Sci Rep* 8:14105.
- 515 23. Tartour K, Nguyen X-N, Appourchaux R, Assil S, Barateau V, Bloyet L-M, Burlaud
- 516 Gaillard J, Confort M-P, Escudero-Perez B, Gruffat H, Hong SS, Moroso M, Reynard O,
- 517 Reynard S, Decembre E, Ftaich N, Rossi A, Wu N, Arnaud F, Baize S, Dreux M, Gerlier D,
- 518 Paranhos-Baccala G, Volchkov V, Roingard P, Cimarelli A. 2017. Interference with the
- 519 production of infectious viral particles and bimodal inhibition of replication are broadly
- 520 conserved antiviral properties of IFITMs. *PLoS Pathog* 13:e1006610.
- 521 24. Damania B, Desrosiers RC. 2001. Simian homologues of human herpesvirus 8. *Phil Trans*
- 522 *R Soc Lond B* 356:535–543.
- 523 25. Wen KW, Damania B. 2010. Kaposi sarcoma-associated herpesvirus (KSHV): Molecular
- 524 biology and oncogenesis. *Cancer Letters* 289:140–150.
- 525 26. Chen Q, Chen J, Li Y, Liu D, Zeng Y, Tian Z, Yunus A, Yang Y, Lu J, Song X, Yuan Y.
- 526 Kaposi's sarcoma herpesvirus is associated with osteosarcoma in Xinjiang populations 8.
- 527 27. Polizzotto MN, Uldrick TS, Hu D, Yarchoan R. 2012. Clinical Manifestations of Kaposi
- 528 Sarcoma Herpesvirus Lytic Activation: Multicentric Castleman Disease (KSHV-MCD) and the
- 529 KSHV Inflammatory Cytokine Syndrome. *Front Microbiol* 3:73.
- 530 28. Stiller CA. 2007. International patterns of cancer incidence in adolescents. *Cancer*
- 531 *Treatment Reviews* 33:631–645.
- 532 29. Chatlynne LG, Ablashi DV. 1999. Seroepidemiology of Kaposi's sarcoma-associated
- 533 herpesvirus (KSHV). *Seminars in Cancer Biology* 9:175–185.

- 534 30. Parkin DM, Sitas F, Chirenje M, Stein L, Abratt R, Wabinga H. 2008. Part I: Cancer in  
535 Indigenous Africans—burden, distribution, and trends. *The Lancet Oncology* 9:683–692.
- 536 31. Amir H, Kaaya EE, Manji KP, Kwesigabo G, Biberfeld P. 2001. Kaposi’s sarcoma before  
537 and during a human immunodeficiency virus epidemic in Tanzanian children: *The Pediatric*  
538 *Infectious Disease Journal* 20:518–521.
- 539 32. Bechtel JT, Liang Y, Hvidding J, Ganem D. 2003. Host Range of Kaposi’s Sarcoma-  
540 Associated Herpesvirus in Cultured Cells. *JVI* 77:6474–6481.
- 541 33. Hahn AS, Desrosiers RC. 2013. Rhesus Monkey Rhadinovirus Uses Eph Family  
542 Receptors for Entry into B Cells and Endothelial Cells but Not Fibroblasts. *PLOS Pathogens*  
543 9:e1003360.
- 544 34. Dollery SJ. 2019. Towards Understanding KSHV Fusion and Entry. *Viruses* 11:1073.
- 545 35. Hahn AS, Kaufmann JK, Wies E, Naschberger E, Panteleev-Ivlev J, Schmidt K, Holzer  
546 A, Schmidt M, Chen J, König S, Ensser A, Myoung J, Brockmeyer NH, Stürzl M, Fleckenstein  
547 B, Neipel F. 2012. The ephrin receptor tyrosine kinase A2 is a cellular receptor for Kaposi’s  
548 sarcoma-associated herpesvirus. *Nat Med* 18:961–966.
- 549 36. Großkopf AK, Ensser A, Neipel F, Jungnickl D, Schlagowski S, Desrosiers RC, Hahn AS.  
550 2018. A conserved Eph family receptor-binding motif on the gH/gL complex of Kaposi’s  
551 sarcoma-associated herpesvirus and rhesus monkey rhadinovirus. 2. *PLoS Pathog* 14:e1006912.
- 552 37. Großkopf AK, Schlagowski S, Hörnich BF, Fricke T, Desrosiers RC, Hahn AS. 2019.  
553 EphA7 Functions as Receptor on BJAB Cells for Cell-to-Cell Transmission of the Kaposi’s  
554 Sarcoma-Associated Herpesvirus and for Cell-Free Infection by the Related Rhesus Monkey  
555 Rhadinovirus. *J Virol* 93:e00064-19, /jvi/93/15/JVI.00064-19.atom.
- 556 38. Großkopf AK, Schlagowski S, Fricke T, Ensser A, Desrosiers RC, Hahn AS. 2021. Plxdc  
557 family members are novel receptors for the rhesus monkey rhadinovirus (RRV). *PLoS Pathog*  
558 17:e1008979.
- 559 39. Hahn A, Birkmann A, Wies E, Dorer D, Mahr K, Sturzl M, Titgemeyer F, Neipel F. 2009.  
560 Kaposi’s Sarcoma-Associated Herpesvirus gH/gL: Glycoprotein Export and Interaction with  
561 Cellular Receptors. *J Virol* 83:396–407.
- 562 40. Akula SM, Pramod NP, Wang F-Z, Chandran B. 2002. Integrin  $\alpha 3\beta 1$  (CD 49c/29) Is a  
563 Cellular Receptor for Kaposi’s Sarcoma-Associated Herpesvirus (KSHV/HHV-8) Entry into the  
564 Target Cells. *Cell* 108:407–419.
- 565 41. Garrigues HJ, DeMaster LK, Rubinchikova YE, Rose TM. 2014. KSHV attachment and  
566 entry are dependent on  $\alpha V\beta 3$  integrin localized to specific cell surface microdomains and do not  
567 correlate with the presence of heparan sulfate. *Virology* 0:118–133.
- 568 42. Raghu H, Sharma-Walia N, Veettil MV, Sadagopan S, Chandran B. 2009. Kaposi’s  
569 Sarcoma-Associated Herpesvirus Utilizes an Actin Polymerization-Dependent Macropinocytic  
570 Pathway To Enter Human Dermal Microvascular Endothelial and Human Umbilical Vein  
571 Endothelial Cells. *JVI* 83:4895–4911.
- 572 43. Akula SM, Naranatt PP, Walia N-S, Wang F-Z, Fegley B, Chandran B. 2003. Kaposi’s  
573 Sarcoma-Associated Herpesvirus (Human Herpesvirus 8) Infection of Human Fibroblast Cells  
574 Occurs through Endocytosis. *JVI* 77:7978–7990.
- 575 44. Zhang W, Zhou F, Greene W, Gao S-J. 2010. Rhesus Rhadinovirus Infection of Rhesus  
576 Fibroblasts Occurs through Clathrin-Mediated Endocytosis. *Journal of Virology* 84:11709–  
577 11717.
- 578 45. Pertel PE. 2002. Human Herpesvirus 8 Glycoprotein B (gB), gH, and gL Can Mediate  
579 Cell Fusion. *JVI* 76:4390–4400.
- 580 46. Chen J, Schaller S, Jardetzky TS, Longnecker R. 2020. Epstein-Barr Virus gH/gL and  
581 Kaposi’s Sarcoma-Associated Herpesvirus gH/gL Bind to Different Sites on EphA2 To Trigger

- 582 Fusion. *J Virol* 94:e01454-20, /jvi/94/21/JVI.01454-20.atom.
- 583 47. Myoung J, Ganem D. 2011. Infection of Lymphoblastoid Cell Lines by Kaposi's  
584 Sarcoma-Associated Herpesvirus: Critical Role of Cell-Associated Virus. *Journal of Virology*  
585 85:9767–9777.
- 586 48. Jarousse N, Chandran B, Coscoy L. 2008. Lack of Heparan Sulfate Expression in B-Cell  
587 Lines: Implications for Kaposi's Sarcoma-Associated Herpesvirus and Murine  
588 Gammaherpesvirus 68 Infections. *Journal of Virology* 82:12591–12597.
- 589 49. Dollery SJ, Santiago-Crespo RJ, Kardava L, Moir S, Berger EA. 2013. Efficient infection  
590 of a human B cell line with cell-free Kaposi's sarcoma-associated herpesvirus. *J Virol*  
591 <https://doi.org/10.1128/JVI.03063-13>.
- 592 50. Stoltz M, Klingström J. 2010. Alpha/Beta Interferon (IFN- $\alpha/\beta$ )-Independent Induction of  
593 IFN- $\lambda 1$  (Interleukin-29) in Response to Hantaan Virus Infection. *JVI* 84:9140–9148.
- 594 51. Tissari J, Sirén J, Meri S, Julkunen I, Matikainen S. 2005. IFN- $\alpha$  Enhances TLR3-  
595 Mediated Antiviral Cytokine Expression in Human Endothelial and Epithelial Cells by Up-  
596 Regulating TLR3 Expression. *J Immunol* 174:4289–4294.
- 597 52. Thube MM, Shil P, Kasbe R, Patil AA, Pawar SD, Mullick J. 2018. Differences in Type I  
598 interferon response in human lung epithelial cells infected by highly pathogenic H5N1 and low  
599 pathogenic H1N1 avian influenza viruses. *Virus Genes* 54:414–423.
- 600 53. Spence JS, He R, Hoffmann H-H, Das T, Thinon E, Rice CM, Peng T, Chandran K, Hang  
601 HC. 2019. IFITM3 directly engages and shuttles incoming virus particles to lysosomes. 3. *Nat*  
602 *Chem Biol* 15:259–268.
- 603 54. Zhao X, Guo F, Liu F, Cuconati A, Chang J, Block TM, Guo J-T. 2014. Interferon  
604 induction of IFITM proteins promotes infection by human coronavirus OC43. 18. *Proceedings of*  
605 *the National Academy of Sciences* 111:6756–6761.
- 606 55. Winkler M, Wrensch F, Bosch P, Knoth M, Schindler M, Gärtner S, Pöhlmann S. 2019.  
607 Analysis of IFITM-IFITM Interactions by a Flow Cytometry-Based FRET Assay. 16. *IJMS*  
608 20:3859.
- 609 56. Rahman K, Coomer CA, Majdoul S, Ding SY, Padilla-Parra S, Compton AA. 2020.  
610 Homology-guided identification of a conserved motif linking the antiviral functions of IFITM3 to  
611 its oligomeric state. *eLife* 9:e58537.
- 612 57. Sanjana NE, Shalem O, Zhang F. 2014. Improved vectors and genome-wide libraries for  
613 CRISPR screening. *Nat Meth* 11:783–784.
- 614 58. Tang Y-W, Johnson JE, Browning PJ, Cruz-Gervis RA, Davis A, Graham BS, Brigham  
615 KL, Oates JA, Loyd JE, Stecenko AA. 2003. Herpesvirus DNA Is Consistently Detected in  
616 Lungs of Patients with Idiopathic Pulmonary Fibrosis. *Journal of Clinical Microbiology* 41:2633–  
617 2640.
- 618 59. Lin Y-C, Boone M, Meuris L, Lemmens I, Van Roy N, Soete A, Reumers J, Moisse M,  
619 Plaisance S, Drmanac R, Chen J, Speleman F, Lambrechts D, Van de Peer Y, Tavernier J,  
620 Callewaert N. 2014. Genome dynamics of the human embryonic kidney 293 lineage in response  
621 to cell biology manipulations. 1. *Nature Communications* 5:4767.
- 622 60. Stürzl M, Gaus D, Dirks WG, Ganem D, Jochmann R. 2013. Kaposi's sarcoma-derived  
623 cell line SLK is not of endothelial origin, but is a contaminant from a known renal carcinoma cell  
624 line. *Int J Cancer* 132:1954–1958.
- 625 61. Myoung J, Ganem D. 2011. Generation of a doxycycline-inducible KSHV producer cell  
626 line of endothelial origin: Maintenance of tight latency with efficient reactivation upon induction.  
627 *Journal of Virological Methods* 174:12–21.
- 628 62. Jia R, Xu F, Qian J, Yao Y, Miao C, Zheng Y-M, Liu S-L, Guo F, Geng Y, Qiao W,  
629 Liang C. 2014. Identification of an endocytic signal essential for the antiviral action of IFITM3:



- 630 Endocytosis of IFITM3 and its antiviral activity. *Cell Microbiol* 16:1080–1093.
- 631 63. Chesarino NM, McMichael TM, Hach JC, Yount JS. 2014. Phosphorylation of the  
632 Antiviral Protein Interferon-inducible Transmembrane Protein 3 (IFITM3) Dually Regulates Its  
633 Endocytosis and Ubiquitination. *Journal of Biological Chemistry* 289:11986–11992.
- 634 64. Zani A, Zhang L, McMichael TM, Kenney AD, Chemudupati M, Kwiek JJ, Liu S-L,  
635 Yount JS. 2019. Interferon-induced transmembrane proteins inhibit cell fusion mediated by  
636 trophoblast syncytins. *Journal of Biological Chemistry* 294:19844–19851.
- 637 65. Dutta D, Chakraborty S, Bandyopadhyay C, Valiya Veetil M, Ansari MA, Singh VV,  
638 Chandran B. 2013. EphrinA2 Regulates Clathrin Mediated KSHV Endocytosis in Fibroblast  
639 Cells by Coordinating Integrin-Associated Signaling and c-Cbl Directed Polyubiquitination.  
640 *PLoS Pathog* 9:e1003510.
- 641 66. Perreira JM, Chin CR, Feeley EM, Brass AL. 2013. IFITMs Restrict the Replication of  
642 Multiple Pathogenic Viruses. *Journal of Molecular Biology* 425:4937–4955.
- 643 67. Hunt CL, Lennemann NJ, Maury W. 2012. Filovirus Entry: A Novelty in the Viral Fusion  
644 World. *Viruses* 4:258–275.
- 645 68. Vidak E, Javoršek U, Vizovišek M, Turk B. 2019. Cysteine Cathepsins and their  
646 Extracellular Roles: Shaping the Microenvironment. *Cells* 8:264.
- 647 69. Winkler M, Gärtner S, Wrensch F, Krawczak M, Sauermann U, Pöhlmann S. 2017.  
648 Rhesus macaque IFITM3 gene polymorphisms and SIV infection. 3. *PLoS ONE* 12:e0172847.
- 649 70. Wilkins J, Zheng Y-M, Yu J, Liang C, Liu S-L. 2016. Nonhuman Primate IFITM Proteins  
650 Are Potent Inhibitors of HIV and SIV. *PLoS ONE* 11:e0156739.
- 651 71. Hickford D, Frankenberg S, Shaw G, Renfree MB. 2012. Evolution of vertebrate  
652 interferon inducible transmembrane proteins. *BMC Genomics* 13:155.
- 653 72. Zhang Z, Liu J, Li M, Yang H, Zhang C. 2012. Evolutionary Dynamics of the Interferon-  
654 Induced Transmembrane Gene Family in Vertebrates. *PLoS ONE* 7:e49265.
- 655 73. Kummer S, Avinoam O, Kräusslich H-G. 2019. IFITM3 Clusters on Virus Containing  
656 Endosomes and Lysosomes Early in the Influenza A Infection of Human Airway Epithelial Cells.  
657 6. *Viruses* 11:548.
- 658 74. Ren L, Du S, Xu W, Li T, Wu S, Jin N, Li C. 2020. Current Progress on Host Antiviral  
659 Factor IFITMs. *Front Immunol* 11:543444.
- 660 75. Buchrieser J, Dufloo J, Hubert M, Monel B, Planas D, Rajah MM, Planchais C, Porrot F,  
661 Guivel-Benhassine F, Van der Werf S, Casartelli N, Mouquet H, Bruel T, Schwartz O. 2020.  
662 Syncytia formation by SARS-CoV-2-infected cells. *EMBO J* 39.
- 663 76. Hörnich BF, Großkopf AK, Schlagowski S, Tenbusch M, Kleine-Weber H, Neipel F,  
664 Stahl-Hennig C, Hahn AS. 2021. SARS-CoV-2 and SARS-CoV Spike-Mediated Cell-Cell  
665 Fusion Differ in Their Requirements for Receptor Expression and Proteolytic Activation. *J Virol*  
666 95.
- 667 77. Ensser A, Yasuda K, Lauer W, Desrosiers RC, Hahn AS. 2020. Rhesus Monkey  
668 Rhadinovirus Isolated from Hemangioma Tissue. *Microbiol Resour Announc* 9.
- 669 78. Tischer BK, von Einem J, Kaufer B, Osterrieder N. 2006. Two-step red-mediated  
670 recombination for versatile high-efficiency markerless DNA manipulation in *Escherichia coli*.  
671 *BioTechniques* 40:191–197.
- 672

673

674 **TABLES**

675 **Table 1.** Cell lines.

| <b>Cell line</b>                         | <b>Origin</b>                                                                                                               |
|------------------------------------------|-----------------------------------------------------------------------------------------------------------------------------|
| 293T cells                               | a kind gift from Vladan Rankovic, Göttingen, Germany, and originally purchased from the ATCC                                |
| A549                                     | Laboratory of Stefan Pöhlmann, German Primate Center-Leibniz Institute for Primate Research, Göttingen, Germany             |
| SLK cells                                | (RRID:CVCL_9569) (NIH AIDS Research and Reference Reagent program)                                                          |
| human foreskin fibroblasts (HFF)         | (laboratory of Klaus Korn, Universitätsklinikum Erlangen, Institute for Clinical and Molecular Virology, Erlangen, Germany) |
| rhesus monkey fibroblasts (RF)           | (laboratory of Prof. Rüdiger Behr, German Primate Center-Leibniz Institute for Primate Research, Göttingen, Germany)        |
| Human vascular endothelial cells (HUVEC) | (PromoCell)                                                                                                                 |
| iSLK cells                               | A kind gift from Don Ganem (61)                                                                                             |

676

677 **Table 2.** Plasmids.

| <b>Plasmid</b> | <b>Source</b> | <b>Reference/Identifier</b> |
|----------------|---------------|-----------------------------|
|----------------|---------------|-----------------------------|

|                                                                             |                                                         |                     |
|-----------------------------------------------------------------------------|---------------------------------------------------------|---------------------|
| psPAX2                                                                      | Addgene (kind gift from<br>Didier Trono)                | Addgene #12260      |
| VSV-G (pMD2.G)                                                              | Addgene Addgene (kind gift<br>from Didier Trono)        | Addgene #12259      |
| plentiCRISPRv2                                                              | Addgene (kind gift from<br>Feng Zhang)                  | Addgene #52961 (57) |
| gag/pol                                                                     | Addgene (kind gift from<br>Tannishtha Reya)             | Addgene #14887      |
| pLenti CMV GFP Neo                                                          | Addgene (kind gift from Eric<br>Campeau & Paul Kaufman) | Addgene #17447      |
| AX526 (Gal4-driven<br>TurboGFP-luciferase<br>reporter lentivirus)           | Laboratory of Alexander<br>Hahn                         | (38)                |
| Gal4-TurboGFP-Luc (Gal4-<br>driven TurboGFP-luciferase<br>reporter plasmid) | Laboratory of Alexander<br>Hahn                         | (76)                |
| Vp16-Gal4                                                                   | Laboratory of Alexander<br>Hahn                         | (76)                |
| pCAGGS IAV_WSN-HA                                                           | Laboratory of Michael<br>Farzan                         | (3)                 |
| pCAGGS IAV_WSN-NA                                                           | Laboratory of Stefan<br>Pöhlmann                        | (3)                 |

|               |                                                  |                |
|---------------|--------------------------------------------------|----------------|
| paMLV_env     | Laboratory of Michael<br>Farzan                  | (3)            |
| pQXCIP        | Laboratory of Stefan<br>Pöhlmann                 | (3)            |
| pQCXIP-IFITM1 | Laboratory of Stefan<br>Pöhlmann                 | (3)            |
| pQCXIP-IFITM2 | Laboratory of Stefan<br>Pöhlmann                 | (3)            |
| pQCXIP-IFITM3 | Laboratory of Stefan<br>Pöhlmann                 | (3)            |
| pEPkan-S      | Addgene (kind gift from<br>Nikolaus Osterrieder) | Addgene #41017 |

678

679 **Table 3.** Oligonucleotides.

| Oligonucleotides                                                     | Sequence                                                          |
|----------------------------------------------------------------------|-------------------------------------------------------------------|
| BAC16_downstream_of_GFP_STOP_overhang_plus_Zeo_3'                    | GGCGGAATCCTCTAGTGC GGCCGAGTCGCGGCCGC<br>TTTATCAGTCCTGCTCCTCGGCC   |
| BAC16_upstream_of_GFP_ATG_antisense_strand_overhang_plus_EM7_P_start | GTAAGCTTGGTACCGAGCTCGGATCCACTAGTCCGC<br>CACCTGTTGACAATTAATCATCGG) |
| mNeonGreen_463-482_for                                               | TACCCAACGACAAAACCAT                                               |
| mNeonGreen_504-523_rev                                               | TGCCATTTCCAGTGGTGTA                                               |

|                                  |                                                                              |
|----------------------------------|------------------------------------------------------------------------------|
| EPKansS_reverse_mNeon_463-482_ov | ATGGTTTTGTCGTTGGGGTACAACCAATTAACCAATT<br>CTGATTAG                            |
| EPKans_forward_mNeon_504-523_ov  | TTACACCACTGGAAATGGCAGGATGACGACGATAAG<br>TAGGGATAAC                           |
| mNeon-GS-KSHVorf65_for           | TGTTGCGGGAAGTGTTCTCCTGAGGCTATTCGCCC<br>GCCTGTGTGGAAGATGGTGAGCAAGGGC          |
| mNeon-GS-KSHVorf65_rev           | TGATCCAGTCGCTCCTGGATCACGGGGTCTCTCACCT<br>TAAAGTTGGACATGCTTCCCTTGTACAGCTCGTCC |

680

681 **Table 4.** Antibodies.

| target              | manufactur<br>er          | Clone/<br>Cat.<br>number | species | dilutio<br>n     | Secondary<br>antibody       | manufactur<br>er    | species | dilution |
|---------------------|---------------------------|--------------------------|---------|------------------|-----------------------------|---------------------|---------|----------|
| <b>Western Blot</b> |                           |                          |         |                  |                             |                     |         |          |
| <b>IFITM1</b>       | R&D                       | AF4827                   | goat    | 1:500            | anti-goat<br>HRP-coupled    | Proteintech         | rabbit  | 1:5000   |
| <b>IFITM2</b>       | Proteintech               | 66137-1-<br>lg           | mouse   | 1:500-<br>1:1000 | anti-mouse<br>HRP-coupled   | Dianova             | donkey  | 1:1000   |
| <b>IFITM3</b>       | Cell Signal<br>Technology | D8E8G                    | rabbit  | 1:1000           | anti-rabbit<br>HRP- coupled | Life<br>Technologie | goat    | 1:1000   |

s

|                |             |            |        |        |              |             |        |        |
|----------------|-------------|------------|--------|--------|--------------|-------------|--------|--------|
| <b>c-Myc</b>   | Santa Cruz  | 9E10       | mouse  | 1:1000 | anti-mouse   | Dianova     | donkey | 1:1000 |
| <b>epitope</b> | Biotechnolo |            |        |        | HRP-coupled  |             |        |        |
|                | gy          |            |        |        |              |             |        |        |
| <b>MxA</b>     | R&D         | AF7946     | goat   | 1:1000 | anti-goat    | Proteintech | rabbit | 1:5000 |
|                |             |            |        |        | HRP-coupled  |             |        |        |
| <b>GAPDH</b>   | GenScript   | <b>N/A</b> | mouse  | 1:1500 | anti-mouse   | Dianova     | donkey | 1:1000 |
|                |             |            |        | 0      | HRP-coupled  |             |        |        |
| <b>V5-tag</b>  | Bio-Rad     | <b>N/A</b> | mouse  | 1:1000 | anti-mouse   | Dianova     | donkey | 1:1000 |
|                |             |            |        |        | HRP-coupled  |             |        |        |
| <b>DYKDD</b>   | Cell Signal | D6W5B      | rabbit | 1:1000 | anti-rabbit  | Life        | goat   | 1:1000 |
| <b>DDK</b>     | Technology  |            |        |        | HRP- coupled | Technologie |        |        |
| <b>(Flag)</b>  |             |            |        |        |              | s           |        |        |
| <b>Tag</b>     |             |            |        |        |              |             |        |        |
| <b>RRV gB</b>  | Scott W.    | 3H8.1      | mouse  | 1:1000 | anti-mouse   | Dianova     | donkey | 1:1000 |
|                | Wong        |            |        |        | HRP-coupled  |             |        |        |
|                | (Oregon     |            |        |        |              |             |        |        |
|                | Health &    |            |        |        |              |             |        |        |
|                | Science     |            |        |        |              |             |        |        |
|                | University) |            |        |        |              |             |        |        |

---

## Flow Cytometry

---

|                              |                           |             |        |       |                 |              |              |
|------------------------------|---------------------------|-------------|--------|-------|-----------------|--------------|--------------|
| <b>IgG1</b>                  | Thermo                    | <b>N/A</b>  | mouse  | 1:500 | anti-mouse      | Life         | donkey 1:500 |
| <b>Isotype</b>               | Fisher Scientific         |             |        |       | Alexa Fluor 647 | Technologies |              |
| <b>EphA2</b>                 | Merck                     | clone F2-27 | mouse  | 1:500 | anti-mouse      | Life         | donkey 1:500 |
|                              |                           |             |        |       | Alexa Fluor 647 | Technologies |              |
| <b>integrin alpha V/CD51</b> | R&D Systems               | P2W7        | mouse  | 1:500 | anti-mouse      | Life         | donkey 1:500 |
|                              |                           |             |        |       | Alexa Fluor 647 | Technologies |              |
| <b>CD71 (TrfR)</b>           | Thermo Fisher Scientific  | OKT9        | mouse  | 1:500 | anti-mouse      | Life         | donkey 1:500 |
|                              |                           |             |        |       | Alexa Fluor 647 | Technologies |              |
| <b>Immunofluorescence</b>    |                           |             |        |       |                 |              |              |
| <b>IFITM1</b>                | R&D                       | AF4827      | goat   | 1:250 | anti-goat       | Life         | donkey 1:500 |
|                              |                           |             |        |       | Alexa Fluor 594 | Technologies |              |
| <b>IFITM2</b>                | Proteintech               | 12769-1-AP  | rabbit | 1:250 | anti-rabbit     | Life         | donkey 1:500 |
|                              |                           |             |        |       | Alexa Fluor 594 | Technologies |              |
| <b>IFITM3</b>                | Cell Signaling Technology | D8E8G       | rabbit | 1:250 | anti-rabbit     | Life         | donkey 1:500 |
|                              |                           |             |        |       | Alexa Fluor 594 | Technologies |              |

|               |              |        |       |       |             |             |              |
|---------------|--------------|--------|-------|-------|-------------|-------------|--------------|
| <b>EEA1</b>   | BD           | 610456 | mouse | 1:400 | anti-mouse  | Life        | donkey 1:500 |
|               | Laboratories |        |       |       | Alexa Fluor | Technologie |              |
|               |              |        |       |       | 647         | s           |              |
| <b>LAMP-1</b> | Santa Cruz   | H5G11  | mouse | 1:750 | anti-mouse  | Life        | donkey 1:500 |
|               | Biotechnolo  |        |       |       | Alexa Fluor | Technologie |              |
|               | gy           |        |       |       | 647         | s           |              |

---

**directly**

**labeled**

**probes**

Phalloidin- AAT 1:1000

iFluor 647 Bioquest

Conjugate

---

682

683

684

685 **FIGURES AND FIGURE LEGENDS**



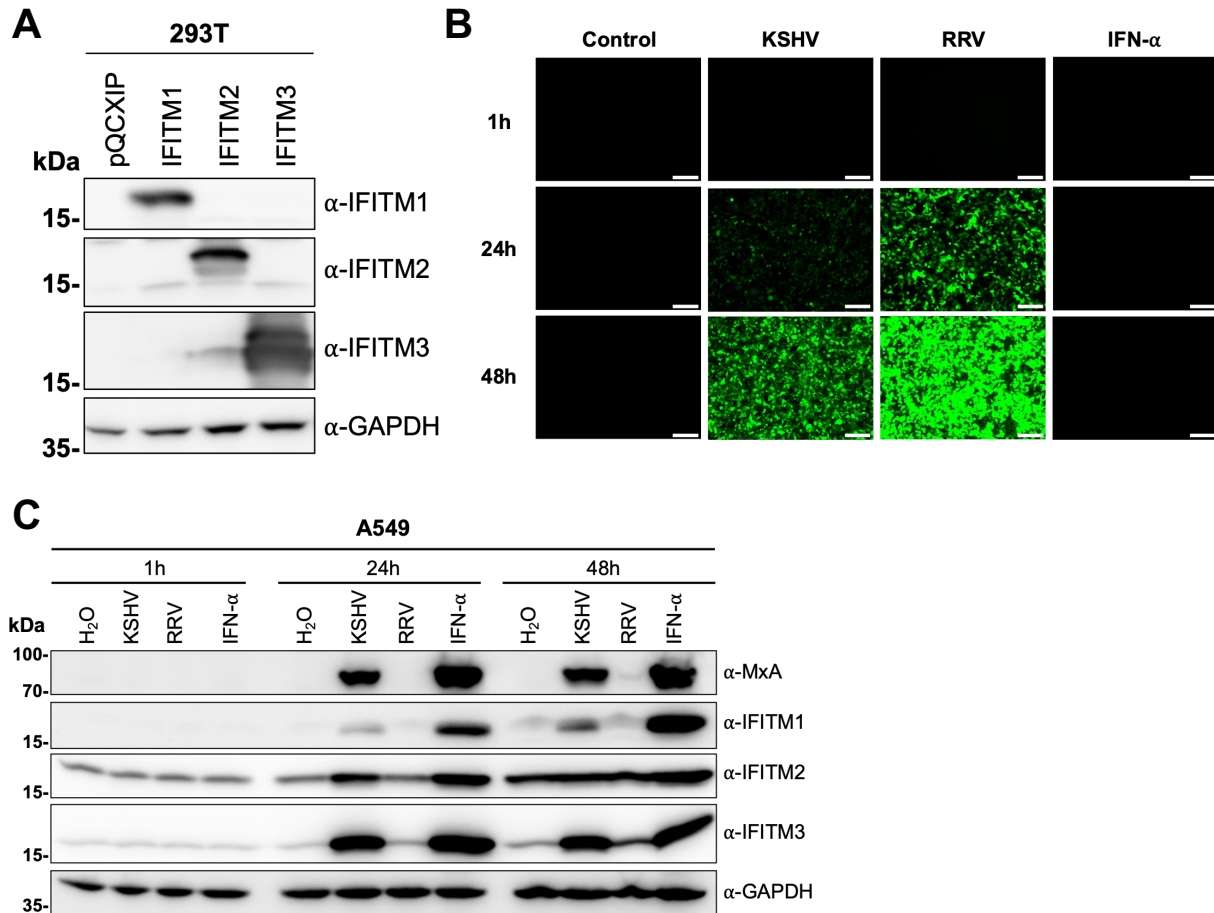

686

687 **Figure 1.** KSHV induces IFITM1, IFITM2 and IFITM3 expression in A549 cells.

688 **(A)** Western blot of 293T cells transduced with pQCXIP-constructs to express IFITM1-3 or

689 pQCXIP (empty vector). IFITMs were detected using the respective IFITM-antibody, GAPDH

690 served as loading control. **(B)** Fluorescence microscopy images (scale 200μm) and **(C)** Western

691 blot analysis of A549 cells infected with KSHV-GFP or RRV-YFP or treated with H<sub>2</sub>O or IFN-α

692 (5000 U/ml) for the indicated time and harvested using SDS sample buffer. IFITM expression

693 was detected with antibodies shown in (A). MxA served as control for IFN-stimulated gene

694 induction; GAPDH served as loading control.

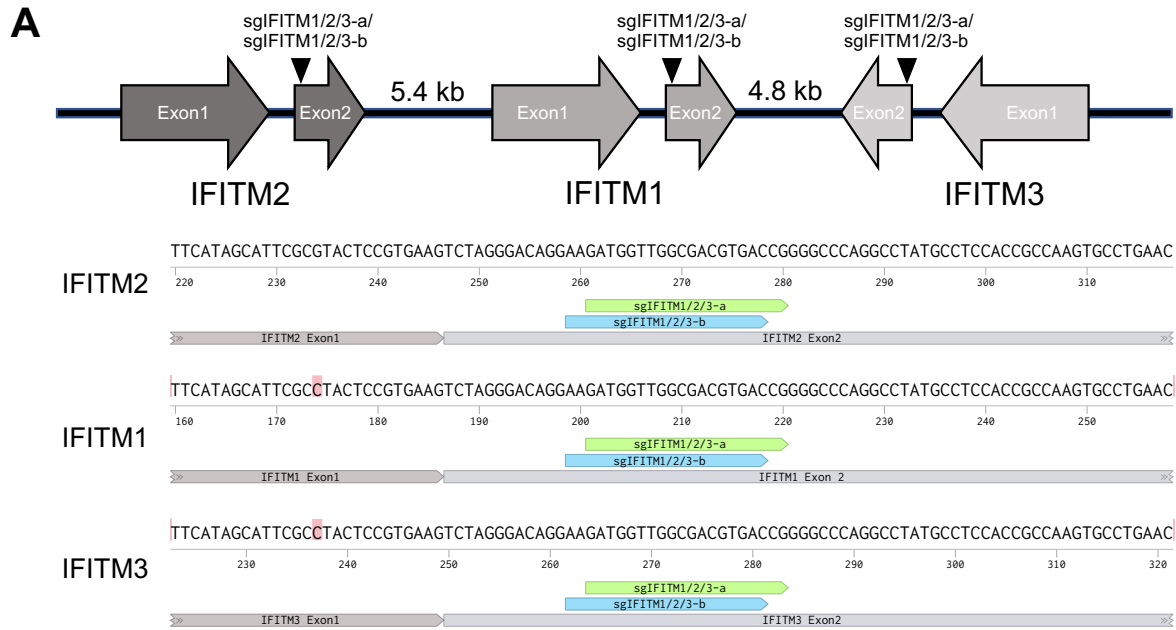

**B**

| sgRNA          | Target        | Target-Sequence      |
|----------------|---------------|----------------------|
| sgNT-a         | non-targeting | ATCGTTTCCGCTTAACGGCG |
| sgNT-b         | non-targeting | TTCGCACGATTGCACCTTGG |
| sgIFITM1/2/3-a | IFITM1-IFITM3 | GATGGTTGGCGACGTGACCG |
| sgIFITM1/2/3-b | IFITM1-IFITM3 | AAGATGGTTGGCGACGTGAC |

695

696 **Figure 2.** Localization of the IFITM-cluster on chromosome 11 in the human genome and sgRNAs

697 used in this study.

698 **(A)** Schematic drawing (not to scale) of the localization of IFITM1, IFITM2, and IFITM3 on

699 chromosome 11 in the human genome with target sites of sgRNAs targeting exon2 of IFITM1-3

700 (sgIFITM1/2/3-a, sgIFITM1/2/3-b; upper panel). Alignment of the target sites of sgIFITM1/2/3-a

701 and sgIFITM1/2/3-b (lower panel). **(B)** Sequences of sgRNAs used in this study.

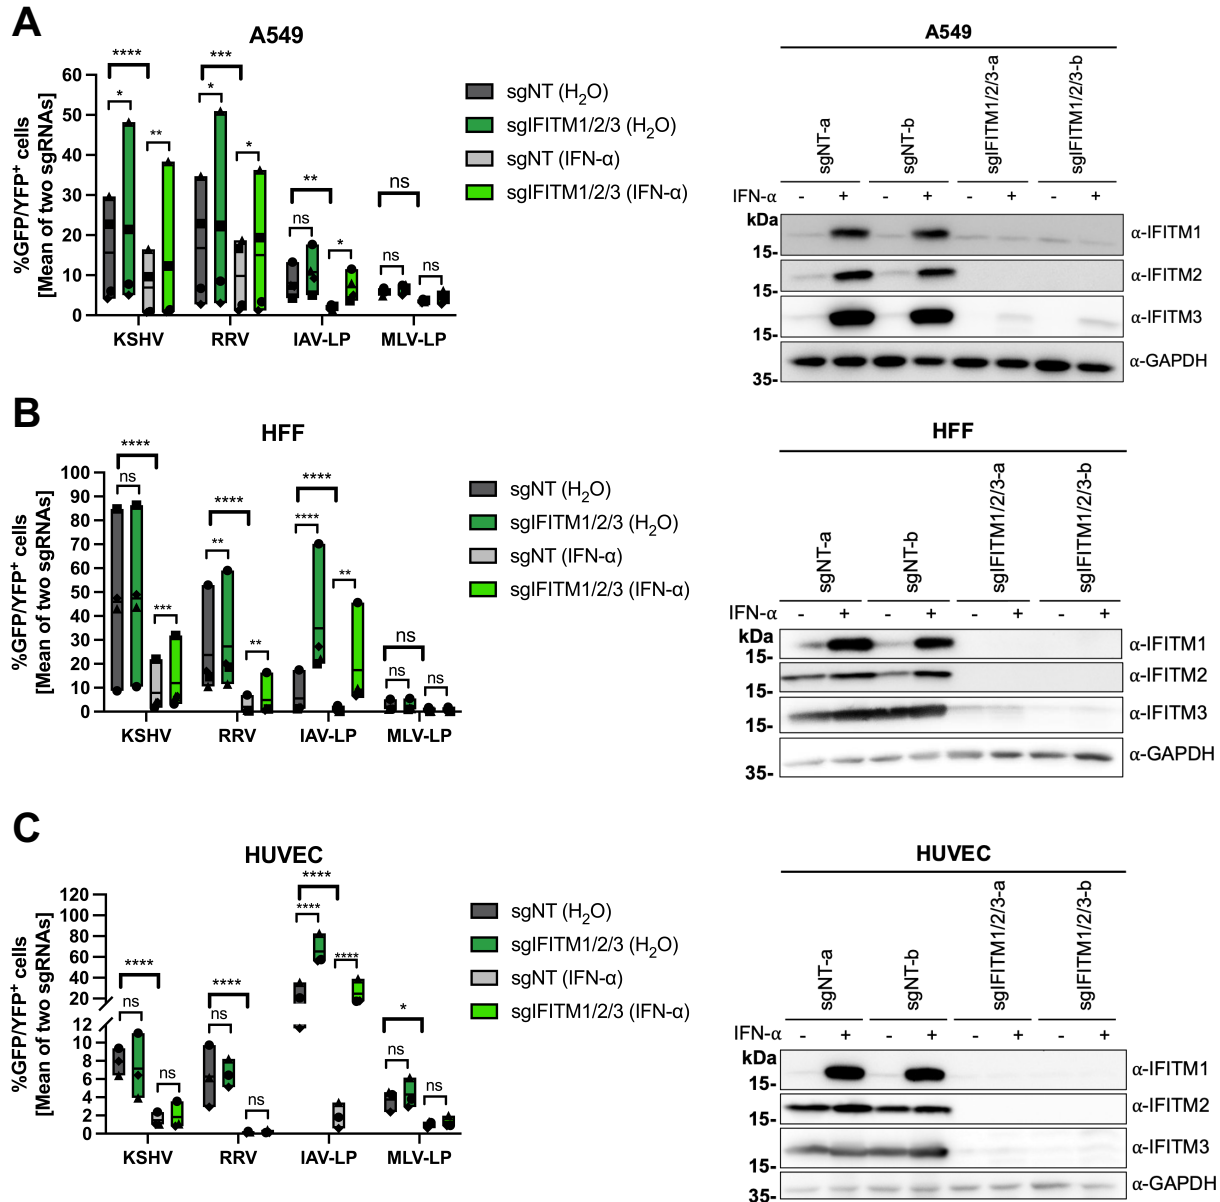

702

703 **Figure 3.** IFITM1/2/3 triple-knockout enhances KSHV and RRV infection in A549 and HFF cells.

704 **(A)** A549, **(B)** HFF and **(C)** HUVEC cells were transduced with lentiviral vectors encoding Cas9 and

705 the sgRNAs shown in Fig. 2. (A-C, left panel) IFITM-knockout (sgIFITM1/2/3-a, sgIFITM1/2/3-b)

706 or control cells (sgNT-a, sgNT-b) treated with IFN- $\alpha$  (5000 U/ml) or H<sub>2</sub>O (control) and infected

707 with KSHV-GFP, RRV-YFP, IAV lentiviral pseudotype (IAV-LP), or MLV lentiviral pseudotype (MLV-

708 LP). Infection was measured using flow cytometry to detect expression of the fluorescent

709 reporter gene. The graph shows individual data points representing averaged values for  
710 GFP<sup>+</sup>/YFP<sup>+</sup> cells of either two non-targeting (sgNT-a, sgNT-b) or IFITM1/2/3 knockout  
711 (sgIFITM1/2/3-a, sgIFITM1/2/3-b) transduced cells and floating bars representing the mean  
712 averaged from four independent experiments for A549 and HFF (A,B) and three independent  
713 experiments for HUVEC (C). Infections for each single experiment were performed in triplicates  
714 for each condition. Datapoints from the same experiment are labeled with identical symbols.  
715 The different sgRNAs were treated as biological replicates within each experiment. Statistical  
716 significance was determined by two-way ANOVA, p-values were corrected for all possible  
717 multiple comparisons within one family by Tukey's method (p>0.05, ns; p≤0.05, \*; p≤0.01, \*\*;  
718 p≤0.001, \*\*\*; p≤0.0001, \*\*\*\*). Representative Western blots (A-C, right panel) of IFITM-  
719 knockout (sgIFITM1/2/3-a or sgIFITM1/2/3-b) or control (sgNT-a or sgNT-b) cells treated with  
720 IFN-α (5000 U/ml) or H<sub>2</sub>O. Indicated IFITM expression was detected with antibodies shown in  
721 Fig. 1A; GAPDH served as loading control.

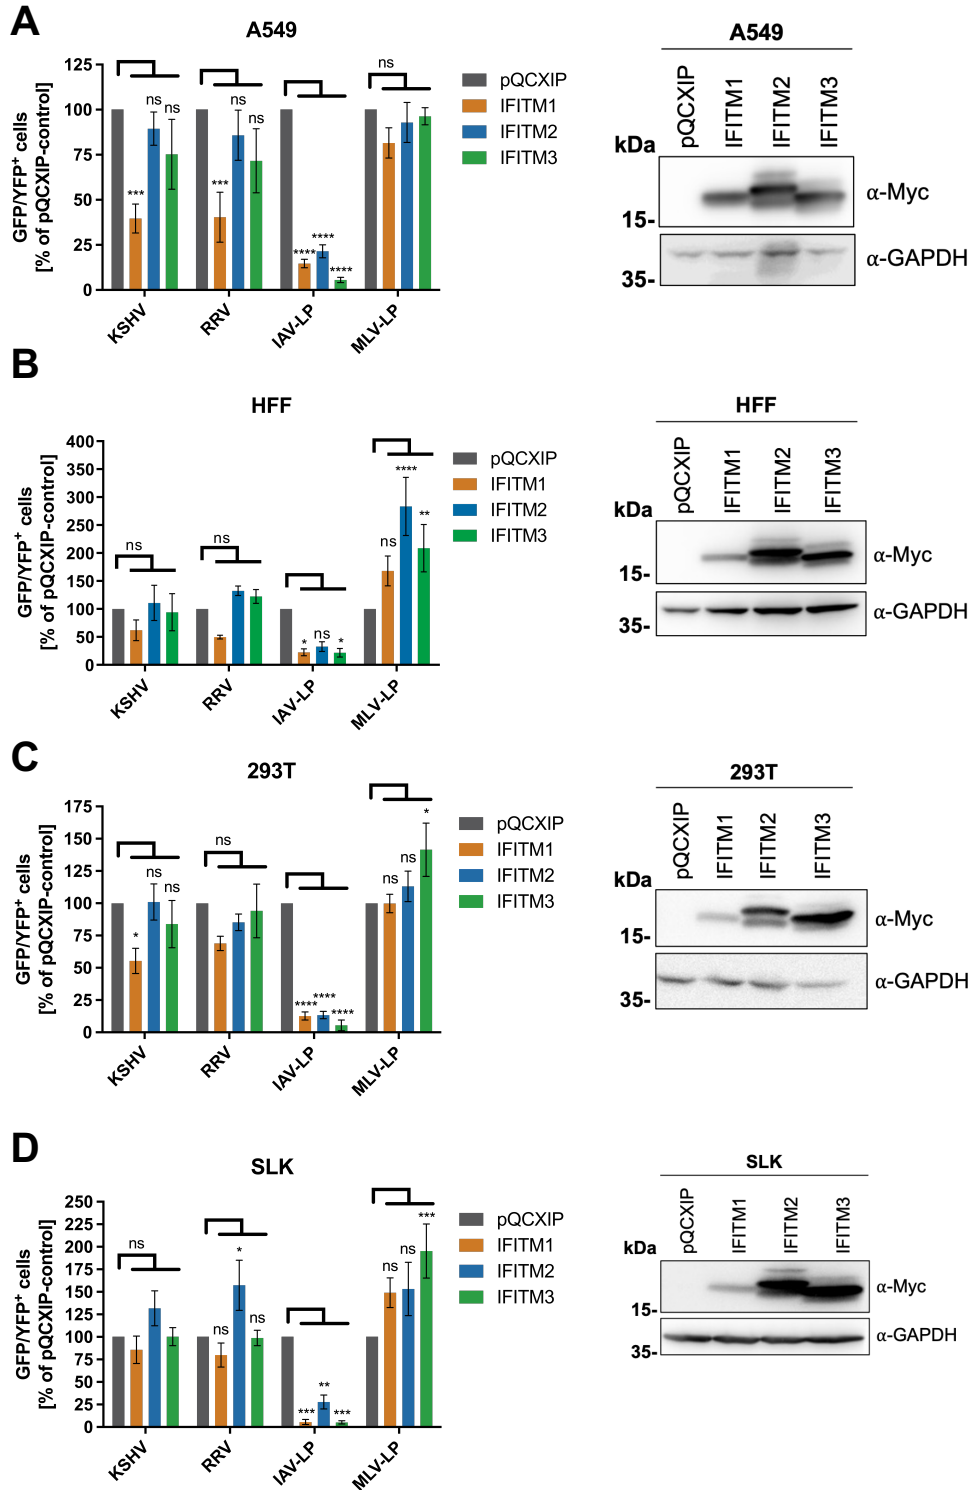

722

723 **Figure 4.** Overexpression of IFITM1 inhibits KSHV and RRV infection in a cell type-dependent

724 manner.

725 **(A)** A549, **(B)** HFF, **(C)** 293T and **(D)** SLK cells were transduced with pQCXIP-constructs to express  
726 IFITM1-3 or pQCXIP (empty vector). (A-D, left panel) IFITM overexpressing cells were infected  
727 with KSHV-GFP, RRV-YFP, IAV lentiviral pseudotype (IAV-LP) or MLV lentiviral pseudotype (MLV-  
728 LP). Infection was measured using flow cytometry to detect expression of the fluorescent  
729 reporter genes. The data shows values normalized to pQCXIP empty vector, which was set to  
730 100%, and the error bars represent the standard error of the mean of four independent  
731 experiments, each performed in triplicates. Statistical significance was determined by ordinary  
732 two-way ANOVA, p-values were corrected for multiple comparisons by Dunnett's method  
733 ( $p > 0.05$ , ns;  $p \leq 0.05$ , \*;  $p \leq 0.01$ , \*\*;  $p \leq 0.001$ , \*\*\*;  $p \leq 0.0001$ , \*\*\*\*). Representative Western blots  
734 (A-C, right panel) of IFITM-overexpressing cells. Expression of myc-tagged IFITMs was  
735 determined using anti-myc antibody; GAPDH served as loading control.

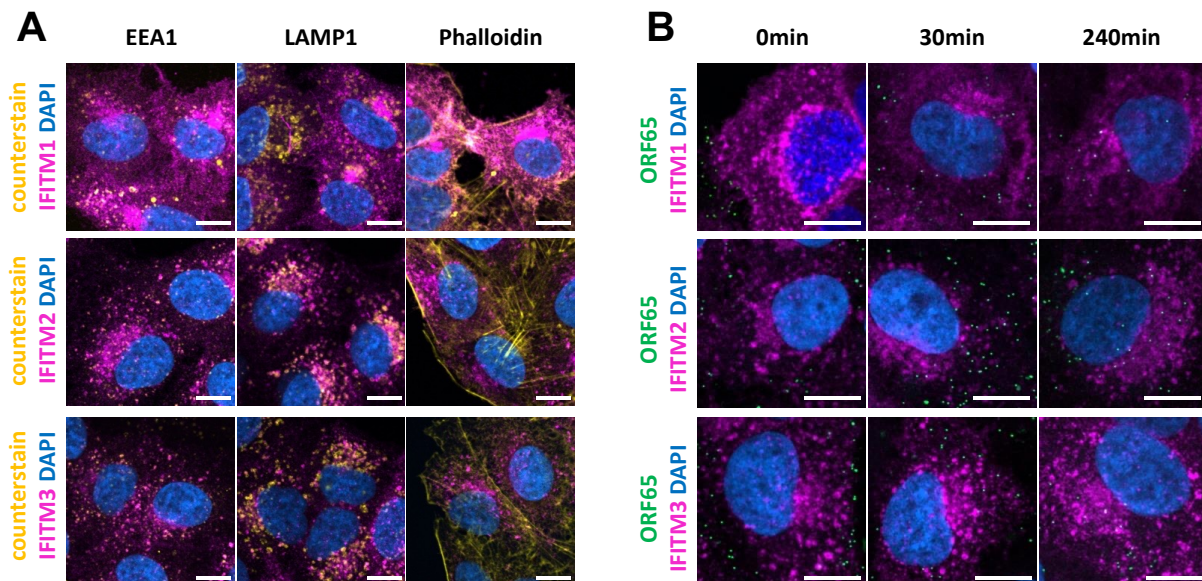

736  
737 **Figure 5.** KSHV virus particles do not extensively colocalize with IFITM1, IFITM2, and IFITM3 in  
738 A549 cells.

739 **(A)** Confocal microscopy images of IFN- $\alpha$ -treated (5000 U/ml) A549 cells stained with IFITM1,  
 740 IFITM2, or IFITM3 antibody (magenta). Co-staining was performed with antibodies to EEA1,  
 741 LAMP1, or phalloidin conjugate (yellow) and Hoechst (blue). **(B)** Confocal microscopy images of  
 742 IFN- $\alpha$ -treated (5000 U/ml) A549 cells, infected with KSHV\_mNeon-orf65 (green). Staining was  
 743 performed using IFITM1, IFITM2, or IFITM3 antibody (magenta) and Hoechst (blue). The Scale  
 744 bars represents 10  $\mu$ m.

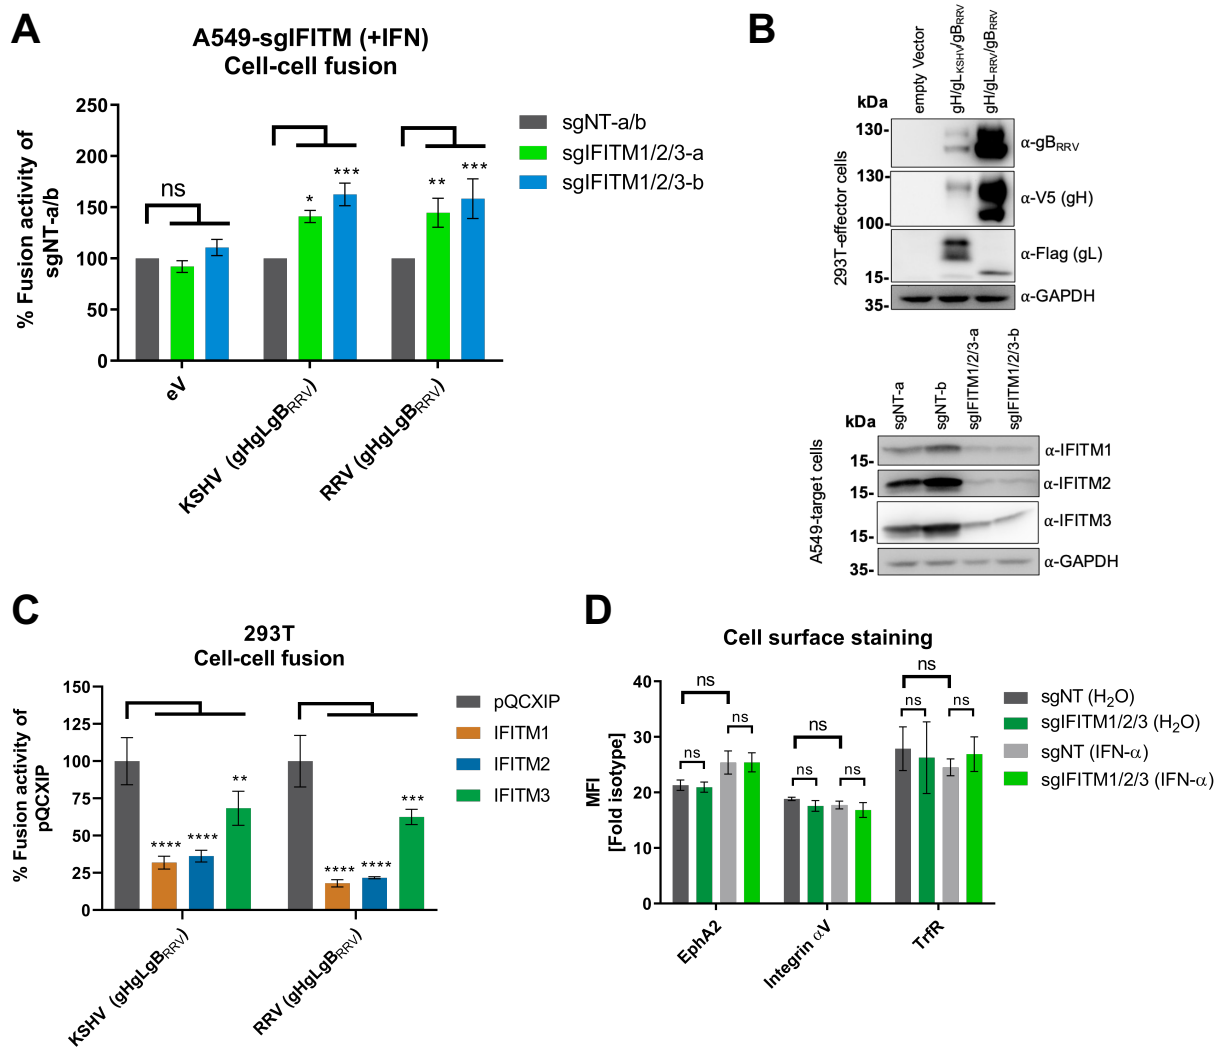

745

746 **Figure 6.** IFITMs inhibit KSHV and RRV glycoprotein-mediated cell-cell fusion.

747 **(A)** Cell-cell fusion assay. Effector cells (293T transfected with either empty vector (eV) or  
748 expression plasmids for the indicated viral glycoproteins together with Vp16-Gal4 expression  
749 plasmid) were added to target cells (A549 cells transduced with a Gal4-driven TurboGFP-  
750 Luciferase construct and the respective CRISPR/Cas9 sgRNA-construct), which had been pre-  
751 incubated for 16h with IFN- $\alpha$  (5000 U/ml). After 48 h, luciferase activity was measured. Values  
752 were normalized to the mean of the two non-targeting controls sgNT-a and sgNT-b (sgNT-a/b),  
753 which was set to 100, for each experiment. Error bars represent standard error of the mean of  
754 four independent experiments, each performed in triplicates. Statistical significance was  
755 determined by two-way ANOVA; p-values were corrected for multiple comparisons by Dunnet's  
756 method ( $p > 0.05$ , ns;  $p \leq 0.05$ , \*;  $p \leq 0.01$ , \*\*;  $p \leq 0.001$ , \*\*\*;  $p \leq 0.0001$ , \*\*\*\*).

757 **(B)** The expression of proteins in 293T effector and A549 target cells after co-cultivation was  
758 analyzed by Western blot from lysates harvested for determination of luciferase activity shown  
759 in **(A)** using the indicated antibodies. GAPDH served as loading control.

760 **(C)** Cell-cell fusion assay. Effector cells (293T transfected with expression plasmids for the  
761 indicated viral glycoproteins together with Vp16-Gal4 expression plasmid) were added to target  
762 cells (293T cells transfected with a Gal4-driven TurboGFP-Luciferase construct and the  
763 respective pQCXIP-IFITM construct). After 48 h, luciferase activity was measured. Values were  
764 averaged from three independent experiments, each performed in triplicates. The data was  
765 normalized to empty vector control pQCXIP, which was set to 100, error bars represent the  
766 standard deviation. Statistical significance was determined by two-way ANOVA, p-values were  
767 corrected for multiple comparisons by Dunnet's method ( $p > 0.05$ , ns;  $p \leq 0.05$ , \*;  $p \leq 0.01$ , \*\*;  
768  $p \leq 0.001$ , \*\*\*;  $p \leq 0.0001$ , \*\*\*\*).



769 **D** A549 cells were transduced with a lentiviral vector encoding Cas9 and sgRNAs shown in Figure  
770 2. IFITM-knockout (sgIFITM1/2/3-a, sgIFITM1/2/3-b) or control cells (sgNT-a and sgNT-b) treated  
771 with IFN- $\alpha$  (5000 U/ml) or H<sub>2</sub>O (control) were stained for cell surface expression of indicated  
772 proteins. The graph shows values for the mean fluorescence intensity fold over isotype control  
773 averaged from two non-targeting (sgNT-a, sgNT-b) or IFITM1/2/3 knockout (sgIFITM1/2/3-a,  
774 sgIFITM1/2/3-b) transduced cells from one representative experiment performed in triplicates.  
775 Error bars represent the standard deviation. Statistical significance was determined by two-way  
776 ANOVA, p-values were corrected for multiple comparisons by Tukey's method (p>0.05, ns;  
777 p $\leq$ 0.05, \*; p $\leq$ 0.01, \*\*; p $\leq$ 0.001, \*\*\*; p $\leq$ 0.0001, \*\*\*\*).

778

779

780
